# Supplementary material
Source: PubMed Central journal article supplement (PMC2868960)
Supplement: NIHMS187442-supplement-2_si_002.pdf [file NIHMS187442-supplement-2_si_002.pdf]

\* Supplemental Parameters for CGenFF SAM Surface Residues  
\* Nadeem A. Vellore, Jeremy A. Yancey, Galen Collier, Robert A. Latour  
\* Department of Bioengineering  
\* Steven J. Stuart  
\* Department of Chemistry  
\* Clemson University  
\* Mar 8, 2010  
\*

! \*\*\*\*\*

! Listed below are parameters not appearing in the CGenFF 2a5 parameter set that  
! are needed to simulate the SAM residues POXY, TFCO, and PEGH found in the file  
! top\_sams\_cgenff.inp. These parameters come from three sources (labeled  
! CGenFF, NHLBI, and CLEMSON) which will be described below.

!  
! The CGenFF parameter set used in this study was the CGenFF version 2a data set  
! which was obtained through private communication with Alex MacKerell in late  
! January of 2009. When version 2a5 was made available we cross-checked the 2a  
! parameters for the SAM residues and found only one difference (in POXY).

!  
! POXY Parameterization:

! -----  
! The phenoxy functionalized SAM residue (POXY) introduced an oxygen atom type  
! "OG301P" just for the purpose of using the CGenFF v2a ethoxybenzene ether  
! oxygen bond stretching parameter CG321 OG301. In CGenFF v2a this parameter  
! was commented out and was totally absent in v2a5--replaced by diethylether  
! oxygen derived parameters. The remaining bond angle, torsion, and Lennard  
! Jones parameters for OG301P are identical to the CGenFF v2a and v2a5 values  
! for OG301 and are given the parameter origin label "CGenFF" below (along with  
! the CGenFF atom type coupling that the parameters were taken from).

!  
! PEGH Parameterization:

! -----  
! When trying to build the oligo ethylene glycol functionalized SAM residue  
! (PEGH), the CGenFF v2a and v2a5 force fields contained a PEGM monomer but not  
! a glycol cap. Thus, our OEG parameters for the O-C-C-O torsion and glycol end  
! patch were obtained from the June 2007 version of the CHARMM32 ether force  
! field in par\_all35\_ethers-nhlbi.prm. These parameters were provided via email  
! correspondence with R.M. Venable as supplemental material to:

! Hwankyu Lee, Richard M Venable, Alexander D MacKerell Jr., Richard W Pastor  
! Molecular dynamics studies of polyethylene oxide and polyethylene glycol:  
! Hydrodynamic radius and shape anisotropy  
! Biophysical Journal 95(4):1590-1599 (2008).  
! Lee, et al., derived the glycol end patch from the hexapyranose files in:  
! Olgun Guvench, Shannon N. Greene, Ganesh Kamath, John W. Brady, Richard M.  
! Venable, Richard W. Pastor, Alexander D. Mackerell Jr.  
! Additive empirical force field for hexopyranose monosaccharides  
! J Comput Chem 29(15):2543-64 (2008).  
! which included ethylene glycol as a model compound.  
! Reference for CHARMM32 ether force field:  
! Vorobyov, I., Anisimov, V.M., Greene, S., Venable, R.M., Moser, A.,  
! Pastor, R.W., and MacKerell, A.D., Jr.  
! Additive and Classical Drude Polarizable Force Fields for Linear and  
! Cyclic Ethers  
! J Chem Theory Comput 3(3):1120-1133 (2007).  
! The CGenFF atom type OG311 did not match the atom type corresponding to the  
! PEG hydroxyl oxygen OC311 in this publication and so we added it to our CGenFF  
! atom type list with the name "OPEG." All parameters taken from  
! par\_all35\_ethers-nhlbi.prm are given the parameter origin label "NHLBI" below.  
! If the parameters were identical to those in CGenFF, their parameter origin  
! label is "CGenFF."  
!  
! TFCO Parameterization:  
! -----  
! Most of the CGenFF force field parameters for the -O-CH2-CF3 trifluoroethoxy  
! group came from trifluoroethanol, which is chemically different from the  
! -CH2-O-CH2-CF3 endcap in TFCO. After scanning the literature, we chose to make  
! parameter fits to MP2 calculations on n-butyl trifluoroethyl ether. When the  
! MP2 energy profile of a bond/dihedral angle for trifluoroethanol matched (or  
! was a close fit with) the MP2 energy profile of n-butyl trifluoroethyl ether,  
! the trifluoroethanol CGenFF parameters were used for TFCO (these are labeled  
! "CLEMSON validated by MP2"). If the n-butyl trifluoroethyl ether MP2 energy  
! profile was significantly different from trifluoroethanol (or if CGenFF lacked  
! a particular torsion angle like CG302 CG321 OG301 CG321), our fitted  
! parameters were used (these are labeled "CLEMSON MP2 fit").  
!  
! Dihedral parameters introduced by our group to the CGenFF data set were fit  
! according to the procedure outlined in:  
! O. Guvench and A. D. MacKerell Jr.

! Automated conformational energy fitting for force-field development  
 ! J Mol Model 14:667-679 (2008).  
 ! using the Python script fit\_dihedral.py, which is available for download at  
 ! <http://mackerell.umaryland.edu>. QM energies used in the fitting were computed  
 ! at the MP2/6-31G(d) level for the SAM residues using Spartan'08 for Mac. The  
 ! MP2 data were from relaxed potential energy scans of the dihedral surfaces in  
 ! question as depicted in the above referenced paper. In these adiabatic scans,  
 ! the dihedral angle investigated was locked to a specific value by the dihedral  
 ! constraint function in Spartan and allowed to relax to its preferred  
 ! MP2/6-31G(d) geometry under that constraint.

! \*\*\*\*\*

## BONDS

!! \*\*\*\*\*

!!  $V(\text{bond}) = K_b \cdot (b - b_0)^2$  \*

!!

\*

!!  $K_b$ : kcal/mol/Å<sup>2</sup> \*

!!  $b_0$ : Å \*

\*

!! \*\*\*\*\*

!! I J Kb b0 ! DESCRIPTION SAMS USING PARAMETER ORIGIN

!! \*\*\*\*\*

CG321 OG301P 428.00 1.4200 ! ETOB, Ethoxybenzene, chayan POXY CGenFF2a: CG321 OG301

CG2R61 OG301P 230.00 1.3820 ! COMPDS PEDRO POXY CGenFF: CG321 OG301

CG321 OPEG 428.00 1.4200 ! methanol vib fit EMB 11/21/89 PEGH CGenFF: CG321 OG311

OPEG HGP1 545.00 0.9600 ! 11/89 methanol vib fit; og tested on MeOH EtOH PEGH CGenFF: OG311 HGP1

## ANGLES

!! \*\*\*\*\*

!!  $V(\text{angle}) = K_{\theta} \cdot (\theta - \theta_0)^2$  \*

!!

\*

!!  $K_{\theta}$ : kcal/mol/rad<sup>2</sup> \*

!!  $\theta_0$ : degrees \*

\*

!! No Urey-Bradley parameters were required for these bond angles. \*

!! \*\*\*\*\*

!! I J K Ktheta Theta0 ! DESCRIPTION SAMS USING PARAMETER ORIGIN

!! \*\*\*\*\*

CG321 CG321 OG301P 45.00 111.50 ! diethylether, alex POXY CGenFF: CG321 CG321 OG301

OG301P CG321 HGA2 45.90 108.89 ! ETOB, Ethoxybenzene, chayan POXY CGenFF: OG301 CG321 HGA2

CG2R61 OG301P CG321 65.00 108.00 ! ETOB, Ethoxybenzene, chayan POXY CGenFF: CG2R61 OG301 CG321

CG2R61 CG2R61 OG301P 110.00 120.00 ! BIPHENYL ANALOGS POXY CGenFF: CG2R61 CG2R61 OG301

OG301 CG321 HGA2 60.00 109.50 ! phosphate, alex TFCO, PEGH NHLBI : HCA2 CC32A OC30A  
 CG302 CG321 OG301 75.00 110.10 ! TFE, trifluoroethanol TFCO CGenFF: CG302 CG321 OG311  
 ! CLEMSON validated by MP2/6-31G(d)  
 OPEG CG321 CG321 75.70 110.10 ! MeOH, EMB, 10/10/89 PEGH CGENFF: CG321 CG321 OG311  
 HGA2 CG321 OPEG 55.00 108.89 ! EtOH RMV Aug07 PEGH CGENFF: OG311 CG321 HGA2  
 CG321 OPEG HGP1 50.00 106.00 ! OG sugar COH, RMV Aug07 PEGH CGENFF: CG321 OG311 HGP1

## DIHEDRALS

!! \*\*\*\*\*

!! V(dihedral) = Kchi\*(1 + cos(n\*chi - delta)) \*

!! \*

!! Kchi: kcal/mol \*

!! n: multiplicity \*

!! delta: degrees \*

!! \*\*\*\*\*

!! I J K L Kchi n delta ! DESCRIPTION SAMS USING PARAMETER ORIGIN

!! \*\*\*\*\*

CG321 CG321 CG321 OG301P 0.1600 1 180.00 ! methylpropylether, 2/12/05,ATM POXY CGenFF: CG321 CG321 CG321 OG301  
 CG321 CG321 CG321 OG301P 0.3900 2 0.00 ! methylpropylether POXY CGenFF: CG321 CG321 CG321 OG301  
 OG301P CG321 CG321 HGA2 0.1900 3 0.00 ! alkane, 4/98, yin & mackerell POXY CGenFF: OG301 CG321 CG321 OG301  
 CG321 CG321 OG301P CG2R61 2.4000 1 180.00 ! PNTM, Pentamidine/ETOB, ... POXY CGenFF: CG321 CG321 OG301 CG2R61  
 CG321 CG321 OG301P CG2R61 1.0000 2 180.00 ! ...Ethoxybenzene, chayan, sz POXY CGenFF: CG321 CG321 OG301 CG2R61  
 HGA2 CG321 OG301P CG2R61 0.0950 3 0.00 ! ETOB, Ethoxybenzene, chayan POXY CGenFF: HGA2 CG321 OG301 CG2R61  
 CG2R61 CG2R61 OG301P CG321 1.6200 2 180.00 ! ETOB, Ethoxybenzene, chayan POXY CGenFF: CG2R61 CG2R61 OG301 CG321  
 CG2R61 CG2R61 OG301P CG321 0.1900 4 180.00 ! ETOB, Ethoxybenzene, chayan POXY CGenFF: CG2R61 CG2R61 OG301 CG321  
 CG2R61 CG2R61 CG2R61 OG301P 3.1000 2 180.00 ! BIPHENYL ANALOGS POXY CGenFF: CG2R61 CG2R61 CG2R61 OG301  
 OG301P CG2R61 CG2R61 HGR61 2.4000 2 180.00 ! BIPHENYL ANALOGS Kenno:4.2->2.4 POXY CGenFF: OG301 CG2R61 CG2R61 HGR61  
 CG302 CG321 OG301 CG321 0.68 1 180.00 ! n-butyl trifluoroethyl ether TFCO CLEMSON MP2/6-31G(d) fit  
 CG302 CG321 OG301 CG321 0.45 2 0.00 ! n-butyl trifluoroethyl ether TFCO CLEMSON MP2/6-31G(d) fit  
 CG302 CG321 OG301 CG321 0.30 3 0.00 ! n-butyl trifluoroethyl ether TFCO CLEMSON MP2/6-31G(d) fit  
 OG301 CG321 CG302 FGA3 0.2500 3 0.00 ! TFE, Trifluoroethanol TFCO CGenFF: FGA3 CG302 CG321 OG311  
 ! CLEMSON validated by MP2/6-31G(d)  
 FGA3 CG302 CG321 HGA2 0.1580 3 0.00 ! TFE, Trifluoroethanol TFCO CGenFF: FGA3 CG302 CG321 HGA2  
 ! CLEMSON validated by MP2/6-31G(d)  
 OG301 CG321 CG321 OG301 0.5900 1 180.00 ! 1,2 dimethoxyethane, 06/07 PEGH NHLBI : OC30A CC32A CC32A OC30A  
 OG301 CG321 CG321 OG301 1.1600 2 0.00 ! 1,2 dimethoxyethane, HKL PEGH NHLBI : OC30A CC32A CC32A OC30A  
 OPEG CG321 CG321 OG301 2.6500 1 180.00 ! glycol RMV Aug07 PEGH NHLBI : OC311 CC32A CC32A OC30A  
 OPEG CG321 CG321 OG301 0.0000 2 0.00 ! glycol RMV Aug07 PEGH NHLBI : OC311 CC32A CC32A OC30A  
 OPEG CG321 CG321 OG301 0.1300 3 180.00 ! glycol RMV Aug07 PEGH NHLBI : OC311 CC32A CC32A OC30A  
 HGP1 OPEG CG321 CG321 0.4000 1 180.00 ! og ethylene glycol PEGH NHLBI : HCP1 OC311 CC32A CC32A

```
HGP1 OPEG CG321 CG321 0.0100 2 0.00 ! " *** NOT suitable for PEGH NHLBI : HCP1 OC311 CC32A CC32A
HGP1 OPEG CG321 CG321 0.2600 3 0.00 ! " *** HO-C-C-C- type alcohols PEGH NHLBI : HCP1 OC311 CC32A CC32A
HGA2 CG321 CG321 OPEG 0.1400 3 0.00 ! glycol RMV Aug07 PEGH NHLBI : HCA2 CC32A CC32A OC311
HGP1 OPEG CG321 HGA2 0.1800 3 0.00 ! og methanol PEGH NHLBI : HCP1 OC311 CC32A HCA2
```

NONBONDED

```
!! *****
!! V(Lennard-Jones) = Eps_i,j[(Rmin_i,j/r_i,j)**12 - 2*(Rmin_i,j/r_i,j)**6] *
!! *
!! epsilon: kcal/mol, Eps_i,j = sqrt(eps_i * eps_j) *
!! Rmin/2: A, Rmin_i,j = (Rmin_i + Rmin_j)/2 *
!! *
!! The second and fifth columns, marked #, are ignored. *
!! No "1-4" eps and Rmin/2 parameters were given for these atom types. *
!! *****
!! atom # eps Rmin/2 # eps Rmin/2 ! DESCRIPTION SAMS USING PARAMETER ORIGIN
!! 1-4 1-4 !
!! *****
OG301P 0.0 -0.1000 1.6500 ! ether; LJ from THP, sng 1/06 POXY CGenFF: OG301
OPEG 0.0 -0.1921 1.7650 ! og MeOH and EtOH 1/06; RMV Aug07 PEGH CGenFF: OG311 = NHLBI: OC311
```

HBOND CUTHB 0.5  
END
