# Supplementary material
Source: PubMed Central journal article supplement (PMC2868960)
Supplement: NIHMS187442-supplement-3_si_003.pdf [file NIHMS187442-supplement-3_si_003.pdf]

## \* Topology Definition for CGenFF SAM Surface Residues

\* Nadeem A. Vellore, Jeremy A. Yancey, Galen Collier, Robert A. Latour

\* Department of Bioengineering

\* Steven J. Stuart

\* Department of Chemistry

\* Clemson University

\* Mar 8, 2010

\*  
34 2

! \*\*\*\*\*

! Included below are the residues required for generating our alkanethiol SAM surfaces in CHARMM. The atom types and partial charges used here were obtained from the CHARMM General Force Field v. 2a5 for Small Molecule Drug Design, with a few exceptions that will be noted. CGenFF version 2a5 can be downloaded at:

! [http://mackerell.umaryland.edu/CHARMM\\_ff\\_params.html](http://mackerell.umaryland.edu/CHARMM_ff_params.html)

! The full citation for CGenFF is:

! Vanommeslaeghe K, Hatcher E, Acharya C, Kundu S, Zhong S, Shim J, Darian E, Guvench O, Lopes P, Vorobyov I, Mackerell AD Jr. CHARMM general force field: A force field for drug-like molecules compatible with the CHARMM all-atom additive biological force fields. J Comput Chem 31(4): 671-690 (2010).

! The SAM residues are all of the form H-S-(CH<sub>2</sub>)<sub>11</sub>-X and are given a three or four letter name determined by the functional group X:

! FUNCTIONAL GROUP: RESIDUE NAME:

| FUNCTIONAL GROUP                                         | RESIDUE NAME    |
|----------------------------------------------------------|-----------------|
| 1) -CH <sub>3</sub>                                      | CH <sub>3</sub> |
| 2) -OH                                                   | OHS             |
| 3) -COO-                                                 | COO             |
| 4) -COOH                                                 | COOH            |
| 5) -NH <sub>3</sub> <sup>+</sup>                         | NH <sub>3</sub> |
| 6) -NH <sub>2</sub>                                      | NH <sub>2</sub> |
| 7) -COOCH <sub>3</sub>                                   | COOC            |
| 8) -NHCOCH <sub>3</sub>                                  | NHCO            |
| 9) -OC <sub>6</sub> H <sub>5</sub>                       | POXY            |
| 10) -OCH <sub>2</sub> CF <sub>3</sub>                    | TFCO            |
| 11) -(OCH <sub>2</sub> CH <sub>2</sub> ) <sub>3</sub> OH | PEGH            |

! To use these CGenFF residues with the CHARMM22 protein parameters, we included the following atom types in the "ATOM" section of the protein topology file.

| CHARMM | CHARMM | CHARMM   | MMFF  | ! DESCRIPTION OF CHARMM ATOMTYPE | !! SAM RESIDUES |
|--------|--------|----------|-------|----------------------------------|-----------------|
| index  | atom-  | mass     | atom- | !! INCLUDING THIS                |                 |
|        | type   | (in amu) | type  | !! ATOM TYPE                     |                 |

! \*\*\*\*\*

! MASS 225 CG321 12.01100 C ! aliphatic C for CH<sub>2</sub> !! CH<sub>2</sub>! MASS 226 HGA2 1.00800 H ! aliphatic proton, CH<sub>2</sub> !! CH<sub>2</sub>

! MASS 227 SG311 32.06000 S ! sulphur, SH, -S- !! SH

! MASS 228 HGP3 1.00800 H ! polar H, thiol !! SH

```

! MASS 229 CG331 12.01100 C ! aliphatic C for methyl group (-CH3) !! CH3, COOC, NHCO
! MASS 230 HGA3 1.00800 H ! aliphatic proton, CH3 !! CH3, COOC, NHCO
! MASS 231 OG311 15.99940 O ! hydroxyl oxygen !! OH, COOH
! MASS 232 HGP1 1.00800 H ! polar H !! OH, COOH, NHCO, PEGH
! MASS 233 CG2O3 12.01100 C ! carbonyl C: [negative] carboxylates !! COO-
! MASS 234 OG2D2 15.99940 O ! carbonyl O: negative groups: carboxylates, !! COO-
! ! carbonate !!
! MASS 235 CG2O2 12.01100 C ! carbonyl C: esters, !! COOH, COOC
! ! [neutral] carboxylic acids !!
! MASS 236 OG2D1 15.99940 O ! carbonyl O: amides, esters, aldehydes, urea !! COOH, COOC, NHCO
! ! [neutral] carboxylic acids !!
! MASS 237 NG3P3 14.00700 N ! primary NH3+, phosphatidylethanolamine !! NH3+
! MASS 238 HGP2 1.00800 H ! polar H, +ve charge !! NH3+
! MASS 239 CG324 12.01100 C ! aliphatic C in CH2, adjacent to positive N !! NH3+
! ! (piperidine) (+) !!
! MASS 240 NG321 14.00700 N ! neutral methylamine nitrogen !! NH2
! MASS 241 HGPAM2 1.00800 H ! polar H, NEUTRAL methylamine (#) !! NH2
! MASS 242 OG302 15.99940 O ! ester -O- !! COOC
! MASS 243 CG2O1 12.01100 C ! carbonyl C: amides !! NHCO
! MASS 244 NG2S1 14.00700 N ! peptide nitrogen (CO=NHR) !! NHCO
! MASS 245 HGR61 1.00800 H ! aromatic H !! POXY
! MASS 246 CG2R61 12.01100 C ! 6-mem aromatic C !! POXY
! MASS 247 OG301P 15.99940 O ! ethoxybenzene ether -O- (~OG301 in CGenFF) !! POXY
! MASS 248 OG301 15.99940 O ! diethylether ether -O- (OG301 in CGenFF) !! TFCO, PEGH
! MASS 249 CG302 12.01100 C ! aliphatic C, no hydrogens, trifluoromethyl !! TFCO
! MASS 250 FGA3 18.99800 F ! aliphatic fluorine, trifluoro !! TFCO
! MASS 251 OPEG 15.99940 O ! hydroxyl oxygen for PEG (~OG311 in CGenFF) !! PEGH
!

```

! Note that these atom types have been renumbered from the CGenFF topology and parameter files obtained at the Mackerell website so that they don't coincide with the CHARMM22 protein atom numbers. We took the parameters from the CGenFF parameter file par\_all36\_cgenff.prm that corresponded to our SAM residues and supplemented them with our own parameters for the POXY, TFCO, and PEGH residues (listed in par\_sams\_cgenff.inp) to create a new parameter file just for the SAMs (all\_sam\_parameters.inp). When running a simulation in CHARMM, the topology and parameter files were loaded using the following sequence:

```

!
! READ rtf card NAME top_all22_prot.inp <-- CGenFF ATOMs added
! READ para card NAME par_all22_prot.inp
! READ rtf card APPEND NAME top_sams_cgenff.inp
! READ para card APPEND NAME all_sam_parameters.inp
!

```

! The internal coordinates (IC) defined for each neutral or cationic residue are those extracted from a MP2/6-31G(d) optimized geometry of a single functionalized alkanethiol chain in vacuum. A 6-31+G(d) basis set was used for the anionic COO- residue. All of the MP2 infrared vibrational frequencies for each reported structure are real indicating energetically stable structures. These IC coordinates are only used in the initialization of the SAM geometry; the CHARMM force field characterizes the SAM structure during minimization and dynamics.

! \*\*\*\*\*

DEFAult FIRSt NONE LAST NONE  
 AUTOgenerate ANGLes DIHEdral

! \*\*\*\*\*

! 01) -CH3 RESIDUE

\*

!

\*

! SAM MODEL

PARENT CGenFF RESIdue \*

! \*\*\*\*\*

\*\*\*\*\*

RESIdue CH3 0.00 !

!

GROUP ! H12C ! Methyl from HEXA (hexane)

ATOM C12 CG331 -0.27 ! / !

ATOM H12A HGA3 0.09 ! H12A-C12 !

ATOM H12B HGA3 0.09 ! /\ !

ATOM H12C HGA3 0.09 ! H12B \ !

GROUP ! !

ATOM C11 CG321 -0.18 ! C11-H11A ! Methylene from HEXA (hexane)

ATOM H11A HGA2 0.09 ! /\ !

ATOM H11B HGA2 0.09 ! / H11B !

GROUP ! !

ATOM C10 CG321 -0.18 ! H10A-C10 !

ATOM H10A HGA2 0.09 ! /\ !

ATOM H10B HGA2 0.09 ! H10B \ !

GROUP ! !

ATOM C09 CG321 -0.18 ! C09-H09A !

ATOM H09A HGA2 0.09 ! /\ !

ATOM H09B HGA2 0.09 ! / H09B !

GROUP ! !

ATOM C08 CG321 -0.18 ! H08A-C08 !

ATOM H08A HGA2 0.09 ! /\ !

ATOM H08B HGA2 0.09 ! H08B \ !

GROUP ! !

ATOM C07 CG321 -0.18 ! C07-H07A !

ATOM H07A HGA2 0.09 ! /\ !

ATOM H07B HGA2 0.09 ! / H07B !

GROUP ! !

ATOM C06 CG321 -0.18 ! H06A-C06 !

ATOM H06A HGA2 0.09 ! /\ !

ATOM H06B HGA2 0.09 ! H06B \ !

GROUP ! !

ATOM C05 CG321 -0.18 ! C05-H05A !

ATOM H05A HGA2 0.09 ! /\ !

ATOM H05B HGA2 0.09 ! / H05B !

GROUP ! !

ATOM C04 CG321 -0.18 ! H04A-C04 !

ATOM H04A HGA2 0.09 ! /\ !

ATOM H04B HGA2 0.09 ! H04B \ !

GROUP ! !

ATOM C03 CG321 -0.18 ! C03-H03A !

ATOM H03A HGA2 0.09 ! /\ !

ATOM H03B HGA2 0.09 ! / H03B !

```

GROUP          !           !
ATOM C02 CG321 -0.18 ! H02A-C02      !
ATOM H02A HGA2  0.09 !   /\      !
ATOM H02B HGA2  0.09 ! H02B \      !
GROUP          !           !
ATOM C01 CG321 -0.11 !      C01-H01A ! Thiol from CYS (amino acid)
ATOM H01A HGA2  0.09 !   / \      !
ATOM H01B HGA2  0.09 !   / H01B    !
          ! /      !
ATOM SH  SG311 -0.23 !   SH      !
ATOM HS  HGP3  0.16 !   \      !
          ! HS      !

```

```
! *****
```

```

BOND  HS SH
BOND  SH C01
BOND  C01 C02 C01 H01A C01 H01B
BOND  C02 C03 C02 H02A C02 H02B
BOND  C03 C04 C03 H03A C03 H03B
BOND  C04 C05 C04 H04A C04 H04B
BOND  C05 C06 C05 H05A C05 H05B
BOND  C06 C07 C06 H06A C06 H06B
BOND  C07 C08 C07 H07A C07 H07B
BOND  C08 C09 C08 H08A C08 H08B
BOND  C09 C10 C09 H09A C09 H09B
BOND  C10 C11 C10 H10A C10 H10B
BOND  C11 C12 C11 H11A C11 H11B
BOND  C12 H12C C12 H12A C12 H12B

```

```
! i j k l R(ij/k) T(ijk/kj) PHI(ijkl) T(jkl) R(kl)
```

```
! -----
IC C02 C01 SH HS 1.5241 109.38 180.00 96.92 1.3418
IC SH C02 *C01 H01A 1.8242 109.38 120.41 109.81 1.0932
IC SH C02 *C01 H01B 1.8242 109.38 -120.41 109.81 1.0932
IC SH C01 C02 C03 1.8242 109.38 180.00 112.12 1.5283
IC C01 C03 *C02 H02A 1.5241 112.12 -121.60 109.49 1.0973
IC C01 C03 *C02 H02B 1.5241 112.12 121.60 109.49 1.0973
IC C01 C02 C03 C04 1.5241 112.12 180.00 112.80 1.5274
IC C02 C04 *C03 H03A 1.5283 112.80 121.93 109.25 1.0982
IC C02 C04 *C03 H03B 1.5283 112.80 -121.93 109.25 1.0982
IC C02 C03 C04 C05 1.5283 112.80 180.00 113.08 1.5270
IC C03 C05 *C04 H04A 1.5274 113.08 -122.02 109.33 1.0986
IC C03 C05 *C04 H04B 1.5274 113.08 122.02 109.33 1.0986
IC C03 C04 C05 C06 1.5274 113.08 180.00 113.13 1.5277
IC C04 C06 *C05 H05A 1.5270 113.13 122.05 109.28 1.0986
IC C04 C06 *C05 H05B 1.5270 113.13 -122.05 109.28 1.0986
IC C04 C05 C06 C07 1.5270 113.13 180.00 113.18 1.5273
IC C05 C07 *C06 H06A 1.5277 113.18 -122.02 109.23 1.0980
IC C05 C07 *C06 H06B 1.5277 113.18 122.02 109.23 1.0980
IC C05 C06 C07 C08 1.5277 113.18 180.00 113.21 1.5271
IC C06 C08 *C07 H07A 1.5273 113.21 122.08 109.21 1.0986
IC C06 C08 *C07 H07B 1.5273 113.21 -122.08 109.21 1.0986
IC C06 C07 C08 C09 1.5273 113.21 180.00 113.26 1.5276

```

```

IC C07 C09 *C08 H08A 1.5271 113.26 -122.08 109.23 1.0986
IC C07 C09 *C08 H08B 1.5271 113.26 122.08 109.23 1.0986
IC C07 C08 C09 C10 1.5271 113.26 180.00 113.24 1.5263
IC C08 C10 *C09 H09A 1.5276 113.24 122.05 109.27 1.0986
IC C08 C10 *C09 H09B 1.5276 113.24 -122.05 109.27 1.0986
IC C08 C09 C10 C11 1.5276 113.24 180.00 113.33 1.5274
IC C09 C11 *C10 H10A 1.5263 113.33 -122.10 109.18 1.0986
IC C09 C11 *C10 H10B 1.5263 113.33 122.10 109.18 1.0986
IC C09 C10 C11 C12 1.5263 113.33 180.00 112.84 1.5267
IC C10 C12 *C11 H11A 1.5274 112.84 121.84 109.61 1.0972
IC C10 C12 *C11 H11B 1.5274 112.84 -121.84 109.61 1.0972
IC C10 C11 C12 H12C 1.5274 112.84 180.00 111.53 1.0941
IC H12C C11 *C12 H12A 1.0941 111.53 120.21 110.86 1.0947
IC H12C C11 *C12 H12B 1.0941 111.53 -120.21 110.86 1.0947

```

! -----

PATChing FIRS NONE LAST NONE

! \*\*\*\*\*

! 02) -OH RESIDUE

\*

! \*

! SAM MODEL

PARENT CGenFF RESIdue \*

! \*\*\*\*\*

```

RESIdue OHS 0.00 !
GROUP ! HO - OH ! Hydroxyl from SER (amino acid)
ATOM OH OG311 -0.65 ! \ ! and ETAM (ethanolamine)
ATOM HO HGP1 0.42 ! \ !
ATOM C11 CG321 0.05 ! C11-H11A !
ATOM H11A HGA2 0.09 ! /\ !
ATOM H11B HGA2 0.09 ! / H11B !
GROUP ! !
ATOM C10 CG321 -0.18 ! H10A-C10 ! Methylene from HEXA (hexane)
ATOM H10A HGA2 0.09 ! /\ !
ATOM H10B HGA2 0.09 ! H10B \ !
GROUP ! !
ATOM C09 CG321 -0.18 ! C09-H09A !
ATOM H09A HGA2 0.09 ! /\ !
ATOM H09B HGA2 0.09 ! / H09B !
GROUP ! !
ATOM C08 CG321 -0.18 ! H08A-C08 !
ATOM H08A HGA2 0.09 ! /\ !
ATOM H08B HGA2 0.09 ! H08B \ !
GROUP ! !
ATOM C07 CG321 -0.18 ! C07-H07A !
ATOM H07A HGA2 0.09 ! /\ !
ATOM H07B HGA2 0.09 ! / H07B !
GROUP ! !
ATOM C06 CG321 -0.18 ! H06A-C06 !
ATOM H06A HGA2 0.09 ! /\ !
ATOM H06B HGA2 0.09 ! H06B \ !
GROUP ! !

```

```

ATOM C05 CG321 -0.18 !      C05-H05A !
ATOM H05A HGA2  0.09 !      /\      !
ATOM H05B HGA2  0.09 !      / H05B  !
GROUP           !           !
ATOM C04 CG321 -0.18 ! H04A-C04      !
ATOM H04A HGA2  0.09 !      /\      !
ATOM H04B HGA2  0.09 ! H04B \      !
GROUP           !           !
ATOM C03 CG321 -0.18 !      C03-H03A !
ATOM H03A HGA2  0.09 !      /\      !
ATOM H03B HGA2  0.09 !      / H03B  !
GROUP           !           !
ATOM C02 CG321 -0.18 ! H02A-C02      !
ATOM H02A HGA2  0.09 !      /\      !
ATOM H02B HGA2  0.09 ! H02B \      !
GROUP           !           !
ATOM C01 CG321 -0.11 !      C01-H01A ! Thiol from CYS (amino acid)
ATOM H01A HGA2  0.09 !      /\      !
ATOM H01B HGA2  0.09 !      / H01B  !
          ! /          !
ATOM SH SG311 -0.23 !  SH          !
ATOM HS HGP3  0.16 !  \          !
          ! HS          !

```

```

! *****

```

```

BOND  HS SH
BOND  SH C01
BOND  C01 C02 C01 H01A C01 H01B
BOND  C02 C03 C02 H02A C02 H02B
BOND  C03 C04 C03 H03A C03 H03B
BOND  C04 C05 C04 H04A C04 H04B
BOND  C05 C06 C05 H05A C05 H05B
BOND  C06 C07 C06 H06A C06 H06B
BOND  C07 C08 C07 H07A C07 H07B
BOND  C08 C09 C08 H08A C08 H08B
BOND  C09 C10 C09 H09A C09 H09B
BOND  C10 C11 C10 H10A C10 H10B
BOND  C11 OH  C11 H11A C11 H11B
BOND  OH HO
DONOr HO OH
ACCEptor OH

```

```

! i j k l R(ij/k) T(ijk/kj) PHI(ijkl) T(jkl) R(kl)
! -----
IC C02 C01 SH HS 1.5240 109.32 -179.95 96.90 1.3414
IC SH C02 *C01 H01A 1.8249 109.32 120.31 109.89 1.0935
IC SH C02 *C01 H01B 1.8249 109.32 -120.35 109.85 1.0934
IC SH C01 C02 C03 1.8249 109.32 -179.95 112.06 1.5284
IC C01 C03 *C02 H02A 1.5240 112.06 -121.56 109.47 1.0969
IC C01 C03 *C02 H02B 1.5240 112.06 121.64 109.51 1.0966
IC C01 C02 C03 C04 1.5240 112.06 179.97 112.79 1.5276
IC C02 C04 *C03 H03A 1.5284 112.79 121.89 109.27 1.0983
IC C02 C04 *C03 H03B 1.5284 112.79 -121.94 109.34 1.0978

```

```

IC C02 C03 C04 C05 1.5284 112.79 -179.95 113.07 1.5272
IC C03 C05 *C04 H04A 1.5276 113.07 -121.96 109.31 1.0984
IC C03 C05 *C04 H04B 1.5276 113.07 121.98 109.35 1.0980
IC C03 C04 C05 C06 1.5276 113.07 179.96 113.15 1.5272
IC C04 C06 *C05 H05A 1.5272 113.15 122.02 109.30 1.0986
IC C04 C06 *C05 H05B 1.5272 113.15 -122.04 109.32 1.0990
IC C04 C05 C06 C07 1.5272 113.15 -179.96 113.15 1.5272
IC C05 C07 *C06 H06A 1.5272 113.15 -122.04 109.32 1.0982
IC C05 C07 *C06 H06B 1.5272 113.15 122.01 109.29 1.0980
IC C05 C06 C07 C08 1.5272 113.15 179.96 113.12 1.5278
IC C06 C08 *C07 H07A 1.5272 113.12 121.96 109.25 1.0988
IC C06 C08 *C07 H07B 1.5272 113.12 -122.06 109.27 1.0976
IC C06 C07 C08 C09 1.5272 113.12 -179.92 113.12 1.5272
IC C07 C09 *C08 H08A 1.5278 113.12 -122.01 109.30 1.0982
IC C07 C09 *C08 H08B 1.5278 113.12 122.00 109.23 1.0982
IC C07 C08 C09 C10 1.5278 113.12 -179.72 113.04 1.5268
IC C08 C10 *C09 H09A 1.5272 113.04 122.08 109.58 1.0982
IC C08 C10 *C09 H09B 1.5272 113.04 -121.79 109.27 1.0988
IC C08 C09 C10 C11 1.5272 113.04 -179.63 112.83 1.5225
IC C09 C11 *C10 H10A 1.5268 112.83 -121.78 109.04 1.0991
IC C09 C11 *C10 H10B 1.5268 112.83 122.44 108.34 1.0966
IC C09 C10 C11 OH 1.5268 112.83 -177.07 112.66 1.4289
IC C10 OH *C11 H11A 1.5225 112.66 124.08 110.99 1.0999
IC C10 OH *C11 H11B 1.5225 112.66 -120.04 105.16 1.0936
IC C10 C11 OH HO 1.5225 112.66 -62.56 106.93 0.9718
! -----

```

PATChing FIRS NONE LAST NONE

! \*\*\*\*\*

! 03) -COO- RESIDUE

\*

!

\*

! SAM MODEL

PARENT CGenFF RESIdue \*

! \*\*\*\*\*

\*\*\*\*\*

```

RESIdue COO -1.00 ! OD ! Carboxylate
GROUP ! \ ! from GLU (amino acid)
ATOM C12 CG2O3 0.62 ! C12 !
ATOM OD OG2D2 -0.76 ! /\ !
ATOM OH OG2D2 -0.76 ! (-) OH \ !
ATOM C11 CG321 -0.28 ! C11-H11A !
ATOM H11A HGA2 0.09 ! /\ !
ATOM H11B HGA2 0.09 ! / H11B !
GROUP ! !
ATOM C10 CG321 -0.18 ! H10A-C10 ! Methylene from HEXA (hexane)
ATOM H10A HGA2 0.09 ! /\ !
ATOM H10B HGA2 0.09 ! H10B \ !
GROUP ! !
ATOM C09 CG321 -0.18 ! C09-H09A !
ATOM H09A HGA2 0.09 ! /\ !
ATOM H09B HGA2 0.09 ! / H09B !
GROUP ! !

```

```

ATOM C08 CG321 -0.18 ! H08A-C08      !
ATOM H08A HGA2  0.09 !  /\      !
ATOM H08B HGA2  0.09 !  H08B \    !
GROUP           !           !
ATOM C07 CG321 -0.18 !      C07-H07A !
ATOM H07A HGA2  0.09 !      /\      !
ATOM H07B HGA2  0.09 !      / H07B  !
GROUP           !           !
ATOM C06 CG321 -0.18 ! H06A-C06      !
ATOM H06A HGA2  0.09 !  /\      !
ATOM H06B HGA2  0.09 !  H06B \    !
GROUP           !           !
ATOM C05 CG321 -0.18 !      C05-H05A !
ATOM H05A HGA2  0.09 !      /\      !
ATOM H05B HGA2  0.09 !      / H05B  !
GROUP           !           !
ATOM C04 CG321 -0.18 ! H04A-C04      !
ATOM H04A HGA2  0.09 !  /\      !
ATOM H04B HGA2  0.09 !  H04B \    !
GROUP           !           !
ATOM C03 CG321 -0.18 !      C03-H03A !
ATOM H03A HGA2  0.09 !      /\      !
ATOM H03B HGA2  0.09 !      / H03B  !
GROUP           !           !
ATOM C02 CG321 -0.18 ! H02A-C02      !
ATOM H02A HGA2  0.09 !  /\      !
ATOM H02B HGA2  0.09 !  H02B \    !
GROUP           !           !
ATOM C01 CG321 -0.11 !      C01-H01A ! Thiol from CYS (amino acid)
ATOM H01A HGA2  0.09 !      /\      !
ATOM H01B HGA2  0.09 !      / H01B  !
          !      /      !
ATOM SH SG311 -0.23 !  SH      !
ATOM HS HGP3  0.16 !  \      !
          !  HS      !

```

```

! *****

```

```

BOND  HS SH
BOND  SH C01
BOND  C01 C02  C01 H01A  C01 H01B
BOND  C02 C03  C02 H02A  C02 H02B
BOND  C03 C04  C03 H03A  C03 H03B
BOND  C04 C05  C04 H04A  C04 H04B
BOND  C05 C06  C05 H05A  C05 H05B
BOND  C06 C07  C06 H06A  C06 H06B
BOND  C07 C08  C07 H07A  C07 H07B
BOND  C08 C09  C08 H08A  C08 H08B
BOND  C09 C10  C09 H09A  C09 H09B
BOND  C10 C11  C10 H10A  C10 H10B
BOND  C11 C12  C11 H11A  C11 H11B
BOND  C12 OH
DOUBLE  C12 OD
IMPRoper  C12 C11 OH OD

```



ACCEptor OD C12  
 ACCEptor OH C12

| !  | i     | j     | k     | l     | R(ij/k) | T(ijk/kj) | PHI(ijkl) | T(jkl) | R(kl)  |
|----|-------|-------|-------|-------|---------|-----------|-----------|--------|--------|
| !  | ----- | ----- | ----- | ----- | -----   | -----     | -----     | -----  | -----  |
| IC | C02   | C01   | SH    | HS    | 1.5236  | 109.53    | 179.05    | 96.97  | 1.3433 |
| IC | SH    | C02   | *C01  | H01A  | 1.8279  | 109.53    | 120.28    | 109.72 | 1.0949 |
| IC | SH    | C02   | *C01  | H01B  | 1.8279  | 109.53    | -120.40   | 109.83 | 1.0942 |
| IC | SH    | C01   | C02   | C03   | 1.8279  | 109.53    | 179.89    | 111.91 | 1.5286 |
| IC | C01   | C03   | *C02  | H02A  | 1.5236  | 111.91    | -121.60   | 109.44 | 1.0974 |
| IC | C01   | C03   | *C02  | H02B  | 1.5236  | 111.91    | 121.48    | 109.36 | 1.0985 |
| IC | C01   | C02   | C03   | C04   | 1.5236  | 111.91    | -179.75   | 113.02 | 1.5279 |
| IC | C02   | C04   | *C03  | H03A  | 1.5286  | 113.02    | 121.89    | 109.15 | 1.0993 |
| IC | C02   | C04   | *C03  | H03B  | 1.5286  | 113.02    | -122.00   | 109.17 | 1.0989 |
| IC | C02   | C03   | C04   | C05   | 1.5286  | 113.02    | -179.73   | 113.09 | 1.5273 |
| IC | C03   | C05   | *C04  | H04A  | 1.5279  | 113.09    | -121.93   | 109.26 | 1.0992 |
| IC | C03   | C05   | *C04  | H04B  | 1.5279  | 113.09    | 121.90    | 109.30 | 1.0988 |
| IC | C03   | C04   | C05   | C06   | 1.5279  | 113.09    | -179.55   | 113.44 | 1.5278 |
| IC | C04   | C06   | *C05  | H05A  | 1.5273  | 113.44    | 122.10    | 109.17 | 1.1000 |
| IC | C04   | C06   | *C05  | H05B  | 1.5273  | 113.44    | -122.05   | 109.16 | 1.0999 |
| IC | C04   | C05   | C06   | C07   | 1.5273  | 113.44    | -179.61   | 113.32 | 1.5283 |
| IC | C05   | C07   | *C06  | H06A  | 1.5278  | 113.32    | -121.99   | 109.17 | 1.0996 |
| IC | C05   | C07   | *C06  | H06B  | 1.5278  | 113.32    | 122.01    | 109.16 | 1.0994 |
| IC | C05   | C06   | C07   | C08   | 1.5278  | 113.32    | -179.85   | 113.55 | 1.5274 |
| IC | C06   | C08   | *C07  | H07A  | 1.5283  | 113.55    | 122.05    | 109.17 | 1.1006 |
| IC | C06   | C08   | *C07  | H07B  | 1.5283  | 113.55    | -122.04   | 109.17 | 1.0996 |
| IC | C06   | C07   | C08   | C09   | 1.5283  | 113.55    | -179.48   | 113.54 | 1.5285 |
| IC | C07   | C09   | *C08  | H08A  | 1.5274  | 113.54    | -122.08   | 109.10 | 1.1004 |
| IC | C07   | C09   | *C08  | H08B  | 1.5274  | 113.54    | 122.18    | 109.08 | 1.0995 |
| IC | C07   | C08   | C09   | C10   | 1.5274  | 113.54    | -179.24   | 113.46 | 1.5288 |
| IC | C08   | C10   | *C09  | H09A  | 1.5285  | 113.46    | 122.15    | 109.52 | 1.1009 |
| IC | C08   | C10   | *C09  | H09B  | 1.5285  | 113.46    | -121.87   | 109.07 | 1.1003 |
| IC | C08   | C09   | C10   | C11   | 1.5285  | 113.46    | -179.62   | 113.58 | 1.5264 |
| IC | C09   | C11   | *C10  | H10A  | 1.5288  | 113.58    | -121.89   | 108.95 | 1.1001 |
| IC | C09   | C11   | *C10  | H10B  | 1.5288  | 113.58    | 122.78    | 108.09 | 1.0966 |
| IC | C09   | C10   | C11   | C12   | 1.5288  | 113.58    | -176.02   | 112.73 | 1.5547 |
| IC | C10   | C12   | *C11  | H11A  | 1.5264  | 112.73    | 123.42    | 108.94 | 1.0965 |
| IC | C10   | C12   | *C11  | H11B  | 1.5264  | 112.73    | -120.19   | 107.59 | 1.1019 |
| IC | C10   | C11   | C12   | OD    | 1.5264  | 112.73    | -134.64   | 116.14 | 1.2705 |
| IC | OD    | C11   | *C12  | OH    | 1.2705  | 116.14    | -179.20   | 115.15 | 1.2714 |
| !  | ----- | ----- | ----- | ----- | -----   | -----     | -----     | -----  | -----  |

PATChing FIRS NONE LAST NONE

```

! *****
! 04) -COOH RESIDUE
!
!
! SAM MODEL
! *****
RESIDue COOH 0.00 !
GROUP ! OD ! Carboxyl
    
```

```

ATOM C12 CG2O2 0.75 !  \ \      ! from GLUP (amino acid patch)
ATOM OD OG2D1 -0.55 ! HO C12      !
ATOM OH OG311 -0.60 !  \ / \     !
ATOM HO HGP1 0.43 !   OH \       !
ATOM C11 CG321 -0.21 !      C11-H11A !
ATOM H11A HGA2 0.09 !     /\       !
ATOM H11B HGA2 0.09 !     / H11B   !
GROUP      !           !
ATOM C10 CG321 -0.18 ! H10A-C10    ! Methylene from HEXA (hexane)
ATOM H10A HGA2 0.09 !     /\       !
ATOM H10B HGA2 0.09 !   H10B \    !
GROUP      !           !
ATOM C09 CG321 -0.18 !      C09-H09A !
ATOM H09A HGA2 0.09 !     /\       !
ATOM H09B HGA2 0.09 !     / H09B   !
GROUP      !           !
ATOM C08 CG321 -0.18 ! H08A-C08    !
ATOM H08A HGA2 0.09 !     /\       !
ATOM H08B HGA2 0.09 !   H08B \    !
GROUP      !           !
ATOM C07 CG321 -0.18 !      C07-H07A !
ATOM H07A HGA2 0.09 !     /\       !
ATOM H07B HGA2 0.09 !     / H07B   !
GROUP      !           !
ATOM C06 CG321 -0.18 ! H06A-C06    !
ATOM H06A HGA2 0.09 !     /\       !
ATOM H06B HGA2 0.09 !   H06B \    !
GROUP      !           !
ATOM C05 CG321 -0.18 !      C05-H05A !
ATOM H05A HGA2 0.09 !     /\       !
ATOM H05B HGA2 0.09 !     / H05B   !
GROUP      !           !
ATOM C04 CG321 -0.18 ! H04A-C04    !
ATOM H04A HGA2 0.09 !     /\       !
ATOM H04B HGA2 0.09 !   H04B \    !
GROUP      !           !
ATOM C03 CG321 -0.18 !      C03-H03A !
ATOM H03A HGA2 0.09 !     /\       !
ATOM H03B HGA2 0.09 !     / H03B   !
GROUP      !           !
ATOM C02 CG321 -0.18 ! H02A-C02    !
ATOM H02A HGA2 0.09 !     /\       !
ATOM H02B HGA2 0.09 !   H02B \    !
GROUP      !           !
ATOM C01 CG321 -0.11 !      C01-H01A ! Thiol from CYS (amino acid)
ATOM H01A HGA2 0.09 !     /\       !
ATOM H01B HGA2 0.09 !     / H01B   !
      ! /           !
ATOM SH SG311 -0.23 !   SH       !
ATOM HS HGP3 0.16 !   \       !
      ! HS       !

```

```
! *****
```

BOND HS SH  
 BOND SH C01  
 BOND C01 C02 C01 H01A C01 H01B  
 BOND C02 C03 C02 H02A C02 H02B  
 BOND C03 C04 C03 H03A C03 H03B  
 BOND C04 C05 C04 H04A C04 H04B  
 BOND C05 C06 C05 H05A C05 H05B  
 BOND C06 C07 C06 H06A C06 H06B  
 BOND C07 C08 C07 H07A C07 H07B  
 BOND C08 C09 C08 H08A C08 H08B  
 BOND C09 C10 C09 H09A C09 H09B  
 BOND C10 C11 C10 H10A C10 H10B  
 BOND C11 C12 C11 H11A C11 H11B  
 BOND C12 OH  
 DOUBLE C12 OD  
 BOND OH HO  
 IMPRoper C12 C11 OH OD  
 DONOr HO OH  
 ACCEptor OD C12  
 ACCEptor OH C12

! i j k l R(ij/k) T(ijk/kj) PHI(ijkl) T(jkl) R(kl)

! -----

|    |     |     |      |      |        |        |         |        |        |
|----|-----|-----|------|------|--------|--------|---------|--------|--------|
| IC | C02 | C01 | SH   | HS   | 1.5235 | 109.35 | 179.95  | 96.89  | 1.3414 |
| IC | SH  | C02 | *C01 | H01A | 1.8257 | 109.35 | 120.36  | 109.87 | 1.0936 |
| IC | SH  | C02 | *C01 | H01B | 1.8257 | 109.35 | -120.38 | 109.88 | 1.0936 |
| IC | SH  | C01 | C02  | C03  | 1.8257 | 109.35 | -179.94 | 112.08 | 1.5281 |
| IC | C01 | C03 | *C02 | H02A | 1.5235 | 112.08 | -121.60 | 109.49 | 1.0967 |
| IC | C01 | C03 | *C02 | H02B | 1.5235 | 112.08 | 121.64  | 109.49 | 1.0967 |
| IC | C01 | C02 | C03  | C04  | 1.5235 | 112.08 | -179.93 | 112.81 | 1.5274 |
| IC | C02 | C04 | *C03 | H03A | 1.5281 | 112.81 | 121.90  | 109.27 | 1.0984 |
| IC | C02 | C04 | *C03 | H03B | 1.5281 | 112.81 | -121.93 | 109.32 | 1.0983 |
| IC | C02 | C03 | C04  | C05  | 1.5281 | 112.81 | -179.77 | 113.03 | 1.5278 |
| IC | C03 | C05 | *C04 | H04A | 1.5274 | 113.03 | -121.97 | 109.33 | 1.0977 |
| IC | C03 | C05 | *C04 | H04B | 1.5274 | 113.03 | 121.97  | 109.35 | 1.0973 |
| IC | C03 | C04 | C05  | C06  | 1.5274 | 113.03 | -179.86 | 113.12 | 1.5271 |
| IC | C04 | C06 | *C05 | H05A | 1.5278 | 113.12 | 122.01  | 109.34 | 1.0985 |
| IC | C04 | C06 | *C05 | H05B | 1.5278 | 113.12 | -122.02 | 109.29 | 1.0986 |
| IC | C04 | C05 | C06  | C07  | 1.5278 | 113.12 | -179.74 | 113.12 | 1.5279 |
| IC | C05 | C07 | *C06 | H06A | 1.5271 | 113.12 | -122.03 | 109.31 | 1.0980 |
| IC | C05 | C07 | *C06 | H06B | 1.5271 | 113.12 | 122.01  | 109.26 | 1.0984 |
| IC | C05 | C06 | C07  | C08  | 1.5271 | 113.12 | -179.84 | 113.18 | 1.5273 |
| IC | C06 | C08 | *C07 | H07A | 1.5279 | 113.18 | 121.96  | 109.29 | 1.0993 |
| IC | C06 | C08 | *C07 | H07B | 1.5279 | 113.18 | -122.07 | 109.32 | 1.0981 |
| IC | C06 | C07 | C08  | C09  | 1.5279 | 113.18 | -179.68 | 113.08 | 1.5272 |
| IC | C07 | C09 | *C08 | H08A | 1.5273 | 113.08 | -121.98 | 109.26 | 1.0981 |
| IC | C07 | C09 | *C08 | H08B | 1.5273 | 113.08 | 122.03  | 109.35 | 1.0981 |
| IC | C07 | C08 | C09  | C10  | 1.5273 | 113.08 | -179.76 | 112.82 | 1.5269 |
| IC | C08 | C10 | *C09 | H09A | 1.5272 | 112.82 | 121.93  | 109.41 | 1.0980 |
| IC | C08 | C10 | *C09 | H09B | 1.5272 | 112.82 | -121.90 | 109.33 | 1.0982 |
| IC | C08 | C09 | C10  | C11  | 1.5272 | 112.82 | -179.87 | 112.03 | 1.5334 |
| IC | C09 | C11 | *C10 | H10A | 1.5269 | 112.03 | -121.42 | 109.15 | 1.0978 |

```

IC C09 C11 *C10 H10B 1.5269 112.03 121.98 109.21 1.0955
IC C09 C10 C11 C12 1.5269 112.03 178.32 111.76 1.5034
IC C10 C12 *C11 H11A 1.5334 111.76 121.77 107.26 1.0926
IC C10 C12 *C11 H11B 1.5334 111.76 -121.10 108.60 1.0955
IC C10 C11 C12 OD 1.5334 111.76 -111.36 126.47 1.2192
IC OD C11 *C12 OH 1.2192 126.47 178.52 111.20 1.3650
IC OD C12 OH HO 1.2192 122.32 0.24 105.39 0.9800
! -----

```

PATChing FIRS NONE LAST NONE

! \*\*\*\*\*

! 05) -NH3+ RESIDUE

\*

!

\*

! SAM MODEL

PARENT CGenFF RESIdue

\*

! \*\*\*\*\*

\*\*\*\*\*

RESIdue NH3 1.00 !

!

GROUP ! HNC ! Protonated amine

ATOM N NG3P3 -0.30 ! / ! from LYS (amino acid)

ATOM HNA HGP2 0.33 ! HNA- N !

ATOM HNB HGP2 0.33 ! /\ !

ATOM HNC HGP2 0.33 ! HNB \ !

ATOM C11 CG324 0.21 ! C11-H11A !

ATOM H11A HGA2 0.05 ! /\ !

ATOM H11B HGA2 0.05 ! / H11B !

GROUP ! !

ATOM C10 CG321 -0.18 ! H10A-C10 ! Methylene from HEXA (hexane)

ATOM H10A HGA2 0.09 ! /\ !

ATOM H10B HGA2 0.09 ! H10B \ !

GROUP ! !

ATOM C09 CG321 -0.18 ! C09-H09A !

ATOM H09A HGA2 0.09 ! /\ !

ATOM H09B HGA2 0.09 ! / H09B !

GROUP ! !

ATOM C08 CG321 -0.18 ! H08A-C08 !

ATOM H08A HGA2 0.09 ! /\ !

ATOM H08B HGA2 0.09 ! H08B \ !

GROUP ! !

ATOM C07 CG321 -0.18 ! C07-H07A !

ATOM H07A HGA2 0.09 ! /\ !

ATOM H07B HGA2 0.09 ! / H07B !

GROUP ! !

ATOM C06 CG321 -0.18 ! H06A-C06 !

ATOM H06A HGA2 0.09 ! /\ !

ATOM H06B HGA2 0.09 ! H06B \ !

GROUP ! !

ATOM C05 CG321 -0.18 ! C05-H05A !

ATOM H05A HGA2 0.09 ! /\ !

ATOM H05B HGA2 0.09 ! / H05B !

GROUP ! !

ATOM C04 CG321 -0.18 ! H04A-C04 !

```

ATOM H04A HGA2  0.09 !   /\      !
ATOM H04B HGA2  0.09 !   H04B \    !
GROUP          !           !
ATOM C03 CG321 -0.18 !     C03-H03A !
ATOM H03A HGA2  0.09 !   /\      !
ATOM H03B HGA2  0.09 !   / H03B  !
GROUP          !           !
ATOM C02 CG321 -0.18 ! H02A-C02    !
ATOM H02A HGA2  0.09 !   /\      !
ATOM H02B HGA2  0.09 !   H02B \    !
GROUP          !           !
ATOM C01 CG321 -0.11 !     C01-H01A ! Thiol from CYS (amino acid)
ATOM H01A HGA2  0.09 !   /\      !
ATOM H01B HGA2  0.09 !   / H01B  !
          ! /      !
ATOM SH  SG311 -0.23 !   SH      !
ATOM HS  HGP3  0.16 !   \      !
          ! HS      !

```

```

! *****

```

```

BOND  HS SH
BOND  SH C01
BOND  C01 C02 C01 H01A C01 H01B
BOND  C02 C03 C02 H02A C02 H02B
BOND  C03 C04 C03 H03A C03 H03B
BOND  C04 C05 C04 H04A C04 H04B
BOND  C05 C06 C05 H05A C05 H05B
BOND  C06 C07 C06 H06A C06 H06B
BOND  C07 C08 C07 H07A C07 H07B
BOND  C08 C09 C08 H08A C08 H08B
BOND  C09 C10 C09 H09A C09 H09B
BOND  C10 C11 C10 H10A C10 H10B
BOND  C11 N   C11 H11A C11 H11B
BOND  N HNA N HNB N HNC
DONOr HNA N
DONOr HNB N
DONOr HNC N

```

```

! i j k l R(ij/k) T(ijk/kj) PHI(ijkl) T(jkl) R(kl)
! -----

```

```

IC C02 C01 SH HS 1.5247 109.11 180.00 96.83 1.3413
IC SH C02 *C01 H01A 1.8243 109.11 120.42 109.89 1.0939
IC SH C02 *C01 H01B 1.8243 109.11 -120.42 109.89 1.0939
IC SH C01 C02 C03 1.8243 109.11 180.00 112.23 1.5266
IC C01 C03 *C02 H02A 1.5247 112.23 -121.59 109.58 1.0965
IC C01 C03 *C02 H02B 1.5247 112.23 121.59 109.58 1.0965
IC C01 C02 C03 C04 1.5247 112.23 180.00 112.59 1.5280
IC C02 C04 *C03 H03A 1.5266 112.59 121.90 109.28 1.0982
IC C02 C04 *C03 H03B 1.5266 112.59 -121.90 109.28 1.0982
IC C02 C03 C04 C05 1.5266 112.59 180.00 113.08 1.5264
IC C03 C05 *C04 H04A 1.5280 113.08 -121.95 109.36 1.0980
IC C03 C05 *C04 H04B 1.5280 113.08 121.95 109.36 1.0980
IC C03 C04 C05 C06 1.5280 113.08 180.00 112.89 1.5277

```

```

IC C04 C06 *C05 H05A 1.5264 112.89 121.97 109.33 1.0980
IC C04 C06 *C05 H05B 1.5264 112.89 -121.97 109.33 1.0980
IC C04 C05 C06 C07 1.5264 112.89 180.00 112.96 1.5276
IC C05 C07 *C06 H06A 1.5277 112.96 -121.97 109.32 1.0980
IC C05 C07 *C06 H06B 1.5277 112.96 121.97 109.32 1.0980
IC C05 C06 C07 C08 1.5277 112.96 180.00 112.74 1.5281
IC C06 C08 *C07 H07A 1.5276 112.74 121.86 109.36 1.0982
IC C06 C08 *C07 H07B 1.5276 112.74 -121.86 109.36 1.0982
IC C06 C07 C08 C09 1.5276 112.74 180.00 112.55 1.5286
IC C07 C09 *C08 H08A 1.5281 112.55 -121.80 109.38 1.0976
IC C07 C09 *C08 H08B 1.5281 112.55 121.80 109.38 1.0976
IC C07 C08 C09 C10 1.5281 112.55 180.00 112.04 1.5314
IC C08 C10 *C09 H09A 1.5286 112.04 121.55 109.49 1.0967
IC C08 C10 *C09 H09B 1.5286 112.04 -121.55 109.49 1.0967
IC C08 C09 C10 C11 1.5286 112.04 180.00 110.94 1.5169
IC C09 C11 *C10 H10A 1.5314 110.94 -121.01 109.90 1.0981
IC C09 C11 *C10 H10B 1.5314 110.94 121.01 109.90 1.0981
IC C09 C10 C11 N 1.5314 110.94 180.00 110.37 1.5224
IC C10 N *C11 H11A 1.5169 110.37 122.01 106.18 1.0917
IC C10 N *C11 H11B 1.5169 110.37 -122.01 106.18 1.0917
IC C10 C11 N HNA 1.5169 110.37 -59.49 110.87 1.0285
IC HNA C11 *N HNB 1.0285 110.87 118.98 110.87 1.0285
IC HNA C11 *N HNC 1.0285 110.87 -120.51 112.43 1.0292
! -----

```

PATChing FIRS NONE LAST NONE

! \*\*\*\*\*

! 06) -NH2 RESIDUE

\*

!

\*

! SAM MODEL

PARENT CGenFF RESIdue

\*

! \*\*\*\*\*

\*\*\*\*\*

RESIdue NH2 0.00 !

GROUP ! ! Amine from

ATOM N NG321 -0.96 ! HNA- N ! PRES LSN (neutral LYS patch)

ATOM HNA HGPAM2 0.34 ! /\ !

ATOM HNB HGPAM2 0.34 ! HNB \ !

ATOM C11 CG321 0.13 ! C11-H11A !

ATOM H11A HGA2 0.075 ! /\ !

ATOM H11B HGA2 0.075 ! / H11B !

GROUP ! !

ATOM C10 CG321 -0.18 ! H10A-C10 ! Methylene from HEXA (hexane)

ATOM H10A HGA2 0.09 ! /\ !

ATOM H10B HGA2 0.09 ! H10B \ !

GROUP ! !

ATOM C09 CG321 -0.18 ! C09-H09A !

ATOM H09A HGA2 0.09 ! /\ !

ATOM H09B HGA2 0.09 ! / H09B !

GROUP ! !

ATOM C08 CG321 -0.18 ! H08A-C08 !

ATOM H08A HGA2 0.09 ! /\ !

```

ATOM H08B HGA2 0.09 ! H08B \      !
GROUp          !          !
ATOM C07 CG321 -0.18 !      C07-H07A !
ATOM H07A HGA2 0.09 !      /\      !
ATOM H07B HGA2 0.09 !      / H07B  !
GROUp          !          !
ATOM C06 CG321 -0.18 ! H06A-C06  !
ATOM H06A HGA2 0.09 !      /\      !
ATOM H06B HGA2 0.09 ! H06B \      !
GROUp          !          !
ATOM C05 CG321 -0.18 !      C05-H05A !
ATOM H05A HGA2 0.09 !      /\      !
ATOM H05B HGA2 0.09 !      / H05B  !
GROUp          !          !
ATOM C04 CG321 -0.18 ! H04A-C04  !
ATOM H04A HGA2 0.09 !      /\      !
ATOM H04B HGA2 0.09 ! H04B \      !
GROUp          !          !
ATOM C03 CG321 -0.18 !      C03-H03A !
ATOM H03A HGA2 0.09 !      /\      !
ATOM H03B HGA2 0.09 !      / H03B  !
GROUp          !          !
ATOM C02 CG321 -0.18 ! H02A-C02  !
ATOM H02A HGA2 0.09 !      /\      !
ATOM H02B HGA2 0.09 ! H02B \      !
GROUp          !          !
ATOM C01 CG321 -0.11 !      C01-H01A ! Thiol from CYS (amino acid)
ATOM H01A HGA2 0.09 !      /\      !
ATOM H01B HGA2 0.09 !      / H01B  !
          ! /          !
ATOM SH SG311 -0.23 ! SH          !
ATOM HS HGP3 0.16 ! \          !
          ! HS          !

```

```
! *****
```

```

BOND HS SH
BOND SH C01
BOND C01 C02 C01 H01A C01 H01B
BOND C02 C03 C02 H02A C02 H02B
BOND C03 C04 C03 H03A C03 H03B
BOND C04 C05 C04 H04A C04 H04B
BOND C05 C06 C05 H05A C05 H05B
BOND C06 C07 C06 H06A C06 H06B
BOND C07 C08 C07 H07A C07 H07B
BOND C08 C09 C08 H08A C08 H08B
BOND C09 C10 C09 H09A C09 H09B
BOND C10 C11 C10 H10A C10 H10B
BOND C11 N C11 H11A C11 H11B
BOND N HNA N HNB
DONOr HNA N
DONOr HNB N

```

```
! i j k l R(ij/k) T(ijk/kj) PHI(ijkl) T(jkl) R(kl)
```

```

! -----
IC C02 C01 SH HS 1.5242 109.42 180.00 96.86 1.3421
IC SH C02 *C01 H01A 1.8251 109.42 120.40 109.83 1.0932
IC SH C02 *C01 H01B 1.8251 109.42 -120.40 109.83 1.0932
IC SH C01 C02 C03 1.8251 109.42 180.00 112.08 1.5267
IC C01 C03 *C02 H02A 1.5242 112.08 -121.58 109.53 1.0973
IC C01 C03 *C02 H02B 1.5242 112.08 121.58 109.53 1.0973
IC C01 C02 C03 C04 1.5242 112.08 180.00 112.81 1.5277
IC C02 C04 *C03 H03A 1.5267 112.81 -121.97 109.27 1.0988
IC C02 C04 *C03 H03B 1.5267 112.81 121.97 109.27 1.0988
IC C02 C03 C04 C05 1.5267 112.81 180.00 113.10 1.5276
IC C03 C05 *C04 H04A 1.5277 113.10 -121.99 109.30 1.0980
IC C03 C05 *C04 H04B 1.5277 113.10 121.99 109.30 1.0980
IC C03 C04 C05 C06 1.5277 113.10 180.00 113.16 1.5266
IC C04 C06 *C05 H05A 1.5276 113.16 122.03 109.31 1.0986
IC C04 C06 *C05 H05B 1.5276 113.16 -122.03 109.31 1.0986
IC C04 C05 C06 C07 1.5276 113.16 180.00 113.16 1.5276
IC C05 C07 *C06 H06A 1.5266 113.16 -122.05 109.27 1.0986
IC C05 C07 *C06 H06B 1.5266 113.16 122.05 109.27 1.0986
IC C05 C06 C07 C08 1.5266 113.16 180.00 113.18 1.5274
IC C06 C08 *C07 H07A 1.5276 113.18 122.02 109.24 1.0980
IC C06 C08 *C07 H07B 1.5276 113.18 -122.02 109.24 1.0980
IC C06 C07 C08 C09 1.5276 113.18 180.00 113.18 1.5276
IC C07 C09 *C08 H08A 1.5274 113.18 -122.05 109.27 1.0986
IC C07 C09 *C08 H08B 1.5274 113.18 122.05 109.27 1.0986
IC C07 C08 C09 C10 1.5274 113.18 180.00 113.23 1.5277
IC C08 C10 *C09 H09A 1.5276 113.23 122.02 109.32 1.0986
IC C08 C10 *C09 H09B 1.5276 113.23 -122.02 109.32 1.0986
IC C08 C09 C10 C11 1.5276 113.23 180.00 113.16 1.5301
IC C09 C11 *C10 H10A 1.5277 113.16 -122.11 109.00 1.0988
IC C09 C11 *C10 H10B 1.5277 113.16 122.11 109.00 1.0988
IC C09 C10 C11 N 1.5277 113.16 180.00 115.91 1.4658
IC C10 N *C11 H11A 1.5301 115.91 122.84 107.57 1.0961
IC C10 N *C11 H11B 1.5301 115.91 -122.84 107.57 1.0961
IC C10 C11 N HNA 1.5301 115.91 -57.53 109.15 1.0201
IC C10 C11 N HNB 1.5301 115.91 57.53 109.15 1.0201
! -----

```

PATChing FIRS NONE LAST NONE

```

! *****
! 07) -COOCH3 RESIDUE *
! *
! SAM MODEL PARENT CGenFF RESIdue *
! *****
RESIdue COOC 0.00 ! H13C !
GROUP ! / !
ATOM C13 CG331 -0.31 ! H13A-C13 ! Methoxycarbonyl from
ATOM H13A HGA3 0.09 ! / \ ! MBUT (methyl-butyrate)
ATOM H13B HGA3 0.09 ! H13B OM !
ATOM H13C HGA3 0.09 ! / !

```



```

ATOM OM OG302 -0.49 ! C12 !
ATOM C12 CG2O2 0.90 ! //\ !
ATOM OD OG2D1 -0.63 ! OD \ !
ATOM C11 CG321 0.08 ! C11-H11A !
ATOM H11A HGA2 0.09 ! /\ !
ATOM H11B HGA2 0.09 ! / H11B !
GROUP ! !
ATOM C10 CG321 -0.18 ! H10A-C10 !
ATOM H10A HGA2 0.09 ! /\ !
ATOM H10B HGA2 0.09 ! H10B \ !
GROUP ! !
ATOM C09 CG321 -0.18 ! C09-H09A ! Methylene from HEXA (hexane)
ATOM H09A HGA2 0.09 ! /\ !
ATOM H09B HGA2 0.09 ! / H09B !
GROUP ! !
ATOM C08 CG321 -0.18 ! H08A-C08 !
ATOM H08A HGA2 0.09 ! /\ !
ATOM H08B HGA2 0.09 ! H08B \ !
GROUP ! !
ATOM C07 CG321 -0.18 ! C07-H07A !
ATOM H07A HGA2 0.09 ! /\ !
ATOM H07B HGA2 0.09 ! / H07B !
GROUP ! !
ATOM C06 CG321 -0.18 ! H06A-C06 !
ATOM H06A HGA2 0.09 ! /\ !
ATOM H06B HGA2 0.09 ! H06B \ !
GROUP ! !
ATOM C05 CG321 -0.18 ! C05-H05A !
ATOM H05A HGA2 0.09 ! /\ !
ATOM H05B HGA2 0.09 ! / H05B !
GROUP ! !
ATOM C04 CG321 -0.18 ! H04A-C04 !
ATOM H04A HGA2 0.09 ! /\ !
ATOM H04B HGA2 0.09 ! H04B \ !
GROUP ! !
ATOM C03 CG321 -0.18 ! C03-H03A !
ATOM H03A HGA2 0.09 ! /\ !
ATOM H03B HGA2 0.09 ! / H03B !
GROUP ! !
ATOM C02 CG321 -0.18 ! H02A-C02 !
ATOM H02A HGA2 0.09 ! /\ !
ATOM H02B HGA2 0.09 ! H02B \ !
GROUP ! !
ATOM C01 CG321 -0.11 ! C01-H01A ! Thiol from CYS (amino acid)
ATOM H01A HGA2 0.09 ! / \ !
ATOM H01B HGA2 0.09 ! / H01B !
! / !
ATOM SH SG311 -0.23 ! SH !
ATOM HS HGP3 0.16 ! \ !
! HS !
! *****

```

```

BOND HS SH

```

BOND SH C01  
 BOND C01 C02 C01 H01A C01 H01B  
 BOND C02 C03 C02 H02A C02 H02B  
 BOND C03 C04 C03 H03A C03 H03B  
 BOND C04 C05 C04 H04A C04 H04B  
 BOND C05 C06 C05 H05A C05 H05B  
 BOND C06 C07 C06 H06A C06 H06B  
 BOND C07 C08 C07 H07A C07 H07B  
 BOND C08 C09 C08 H08A C08 H08B  
 BOND C09 C10 C09 H09A C09 H09B  
 BOND C10 C11 C10 H10A C10 H10B  
 BOND C11 C12 C11 H11A C11 H11B  
 BOND C12 OM  
 DOUBLE C12 OD  
 BOND OM C13  
 BOND C13 H13A C13 H13B C13 H13C  
 IMPRoper C12 C11 OM OD  
 ACCEptor OM C12  
 ACCEptor OD C12

! i j k l R(ij/k) T(ijk/kj) PHI(ijkl) T(jkl) R(kl)

! -----

|    |     |     |      |      |        |        |         |        |        |
|----|-----|-----|------|------|--------|--------|---------|--------|--------|
| IC | C02 | C01 | SH   | HS   | 1.5241 | 109.34 | 180.00  | 96.90  | 1.3418 |
| IC | SH  | C02 | *C01 | H01A | 1.8254 | 109.34 | 120.38  | 109.88 | 1.0933 |
| IC | SH  | C02 | *C01 | H01B | 1.8254 | 109.34 | -120.38 | 109.88 | 1.0933 |
| IC | SH  | C01 | C02  | C03  | 1.8254 | 109.34 | 180.00  | 112.07 | 1.5277 |
| IC | C01 | C03 | *C02 | H02A | 1.5241 | 112.07 | -121.59 | 109.51 | 1.0972 |
| IC | C01 | C03 | *C02 | H02B | 1.5241 | 112.07 | 121.59  | 109.51 | 1.0972 |
| IC | C01 | C02 | C03  | C04  | 1.5241 | 112.07 | 180.00  | 112.86 | 1.5269 |
| IC | C02 | C04 | *C03 | H03A | 1.5277 | 112.86 | 121.97  | 109.26 | 1.0988 |
| IC | C02 | C04 | *C03 | H03B | 1.5277 | 112.86 | -121.97 | 109.26 | 1.0988 |
| IC | C02 | C03 | C04  | C05  | 1.5277 | 112.86 | 180.00  | 113.08 | 1.5274 |
| IC | C03 | C05 | *C04 | H04A | 1.5269 | 113.08 | -122.04 | 109.29 | 1.0986 |
| IC | C03 | C05 | *C04 | H04B | 1.5269 | 113.08 | 122.04  | 109.29 | 1.0986 |
| IC | C03 | C04 | C05  | C06  | 1.5269 | 113.08 | 180.00  | 113.23 | 1.5277 |
| IC | C04 | C06 | *C05 | H05A | 1.5274 | 113.23 | 122.06  | 109.25 | 1.0986 |
| IC | C04 | C06 | *C05 | H05B | 1.5274 | 113.23 | -122.06 | 109.25 | 1.0986 |
| IC | C04 | C05 | C06  | C07  | 1.5274 | 113.23 | 180.00  | 113.16 | 1.5263 |
| IC | C05 | C07 | *C06 | H06A | 1.5277 | 113.16 | -122.02 | 109.33 | 1.0986 |
| IC | C05 | C07 | *C06 | H06B | 1.5277 | 113.16 | 122.02  | 109.33 | 1.0986 |
| IC | C05 | C06 | C07  | C08  | 1.5277 | 113.16 | 180.00  | 113.24 | 1.5275 |
| IC | C06 | C08 | *C07 | H07A | 1.5263 | 113.24 | 122.06  | 109.26 | 1.0986 |
| IC | C06 | C08 | *C07 | H07B | 1.5263 | 113.24 | -122.06 | 109.26 | 1.0986 |
| IC | C06 | C07 | C08  | C09  | 1.5263 | 113.24 | 180.00  | 113.16 | 1.5265 |
| IC | C07 | C09 | *C08 | H08A | 1.5275 | 113.16 | -122.04 | 109.28 | 1.0986 |
| IC | C07 | C09 | *C08 | H08B | 1.5275 | 113.16 | 122.04  | 109.28 | 1.0986 |
| IC | C07 | C08 | C09  | C10  | 1.5275 | 113.16 | 180.00  | 112.89 | 1.5274 |
| IC | C08 | C10 | *C09 | H09A | 1.5265 | 112.89 | 121.93  | 109.49 | 1.0986 |
| IC | C08 | C10 | *C09 | H09B | 1.5265 | 112.89 | -121.93 | 109.49 | 1.0986 |
| IC | C08 | C09 | C10  | C11  | 1.5265 | 112.89 | 180.00  | 112.21 | 1.5231 |
| IC | C09 | C11 | *C10 | H10A | 1.5274 | 112.21 | -122.20 | 109.29 | 1.0955 |
| IC | C09 | C11 | *C10 | H10B | 1.5274 | 112.21 | 122.20  | 109.29 | 1.0955 |

```

IC C09 C10 C11 C12 1.5274 112.21 180.00 112.71 1.5093
IC C10 C12 *C11 H11A 1.5231 112.71 123.14 107.87 1.0967
IC C10 C12 *C11 H11B 1.5231 112.71 -123.14 107.87 1.0967
IC C10 C11 C12 OM 1.5231 112.71 180.00 110.73 1.3584
IC OM C11 *C12 OD 1.3584 110.73 180.00 125.88 1.2198
IC C11 C12 OM C13 1.5093 110.73 180.00 114.04 1.4414
IC C12 OM C13 H13A 1.3584 114.04 -60.46 110.45 1.0905
IC H13A OM *C13 H13B 1.0905 110.45 120.93 110.45 1.0905
IC H13A OM *C13 H13C 1.0905 110.45 -119.54 105.05 1.0883

```

```
! -----
```

PATChing FIRS NONE LAST NONE

```
! *****
```

```
! 08) -NHCOCH3 RESIDUE
```

```
*
```

```
!
```

```
*
```

```
! SAM MODEL
```

```
PARENT CGenFF RESidue
```

```
*
```

```
! *****
```

```
*****
```

```
RESidue NHCO 0.00 !
```

```
!
```

```
GROUP ! H13C ! -CO-CH3 charge groups
```

```
ATOM C13 CG331 -0.27 ! / ! from NMA (N-methylacetamide)
```

```
ATOM H13A HGA3 0.09 ! H13A-C13 !
```

```
ATOM H13B HGA3 0.09 ! /\ !
```

```
ATOM H13C HGA3 0.09 ! H13B \ !
```

```
GROUP ! C12 !
```

```
ATOM C12 CG201 0.51 ! ||\ HN !
```

```
ATOM OD OG2D1 -0.51 ! OD \ | !
```

```
GROUP ! N ! -NH-CH2- charge group
```

```
ATOM N NG2S1 -0.47 ! \ ! from GLY (amino acid)
```

```
ATOM HN HGP1 0.31 ! \ !
```

```
ATOM C11 CG321 -0.02 ! C11-H11A!
```

```
ATOM H11A HGA2 0.09 ! /\ !
```

```
ATOM H11B HGA2 0.09 ! / H11B !
```

```
GROUP ! !
```

```
ATOM C10 CG321 -0.18 ! H10A-C10 ! Methylene from HEXA (hexane)
```

```
ATOM H10A HGA2 0.09 ! /\ !
```

```
ATOM H10B HGA2 0.09 ! H10B \ !
```

```
GROUP ! !
```

```
ATOM C09 CG321 -0.18 ! C09-H09A !
```

```
ATOM H09A HGA2 0.09 ! /\ !
```

```
ATOM H09B HGA2 0.09 ! / H09B !
```

```
GROUP ! !
```

```
ATOM C08 CG321 -0.18 ! H08A-C08 !
```

```
ATOM H08A HGA2 0.09 ! /\ !
```

```
ATOM H08B HGA2 0.09 ! H08B \ !
```

```
GROUP ! !
```

```
ATOM C07 CG321 -0.18 ! C07-H07A !
```

```
ATOM H07A HGA2 0.09 ! /\ !
```

```
ATOM H07B HGA2 0.09 ! / H07B !
```

```
GROUP ! !
```

```
ATOM C06 CG321 -0.18 ! H06A-C06 !
```

```

ATOM H06A HGA2 0.09 ! /\ !
ATOM H06B HGA2 0.09 ! H06B \ !
GROUP ! !
ATOM C05 CG321 -0.18 ! C05-H05A !
ATOM H05A HGA2 0.09 ! /\ !
ATOM H05B HGA2 0.09 ! / H05B !
GROUP ! !
ATOM C04 CG321 -0.18 ! H04A-C04 !
ATOM H04A HGA2 0.09 ! /\ !
ATOM H04B HGA2 0.09 ! H04B \ !
GROUP ! !
ATOM C03 CG321 -0.18 ! C03-H03A !
ATOM H03A HGA2 0.09 ! /\ !
ATOM H03B HGA2 0.09 ! / H03B !
GROUP ! !
ATOM C02 CG321 -0.18 ! H02A-C02 !
ATOM H02A HGA2 0.09 ! /\ !
ATOM H02B HGA2 0.09 ! H02B \ !
GROUP ! !
ATOM C01 CG321 -0.11 ! C01-H01A ! Thiol from CYS (amino acid)
ATOM H01A HGA2 0.09 ! / \ !
ATOM H01B HGA2 0.09 ! / H01B !
! / !
ATOM SH SG311 -0.23 ! SH !
ATOM HS HGP3 0.16 ! \ !
! HS !

```

```

! *****

```

```

BOND HS SH
BOND SH C01
BOND C01 C02 C01 H01A C01 H01B
BOND C02 C03 C02 H02A C02 H02B
BOND C03 C04 C03 H03A C03 H03B
BOND C04 C05 C04 H04A C04 H04B
BOND C05 C06 C05 H05A C05 H05B
BOND C06 C07 C06 H06A C06 H06B
BOND C07 C08 C07 H07A C07 H07B
BOND C08 C09 C08 H08A C08 H08B
BOND C09 C10 C09 H09A C09 H09B
BOND C10 C11 C10 H10A C10 H10B
BOND C11 N C11 H11A C11 H11B
BOND N C12 N HN
BOND C12 C13
DOUBLE C12 OD
BOND C13 H13A C13 H13B C13 H13C
IMPRoper N C12 C11 HN
IMPRoper C12 C13 N OD
DONOr HN N
ACCEptor OD C12

```

```

! i j k l R(ij/k) T(ijk/kj) PHI(ijkl) T(jkl) R(kl)
! -----

```

```

IC C02 C01 SH HS 1.5251 109.35 -179.86 96.89 1.3415

```

```

IC SH C02 *C01 H01A 1.8251 109.35 120.41 109.87 1.0933
IC SH C02 *C01 H01B 1.8251 109.35 -120.35 109.82 1.0931
IC SH C01 C02 C03 1.8251 109.35 -179.81 112.07 1.5278
IC C01 C03 *C02 H02A 1.5251 112.07 -121.52 109.54 1.0969
IC C01 C03 *C02 H02B 1.5251 112.07 121.60 109.58 1.0961
IC C01 C02 C03 C04 1.5251 112.07 -179.95 112.79 1.5273
IC C02 C04 *C03 H03A 1.5278 112.79 121.91 109.29 1.0980
IC C02 C04 *C03 H03B 1.5278 112.79 -121.94 109.30 1.0979
IC C02 C03 C04 C05 1.5278 112.79 -179.69 113.13 1.5268
IC C03 C05 *C04 H04A 1.5273 113.13 -121.92 109.30 1.0992
IC C03 C05 *C04 H04B 1.5273 113.13 122.04 109.36 1.0978
IC C03 C04 C05 C06 1.5273 113.13 -179.97 113.14 1.5270
IC C04 C06 *C05 H05A 1.5268 113.14 122.04 109.32 1.0982
IC C04 C06 *C05 H05B 1.5268 113.14 -122.03 109.27 1.0992
IC C04 C05 C06 C07 1.5268 113.14 -179.73 113.20 1.5274
IC C05 C07 *C06 H06A 1.5270 113.20 -122.01 109.27 1.0984
IC C05 C07 *C06 H06B 1.5270 113.20 122.06 109.26 1.0977
IC C05 C06 C07 C08 1.5270 113.20 -179.98 113.18 1.5274
IC C06 C08 *C07 H07A 1.5274 113.18 122.04 109.27 1.0989
IC C06 C08 *C07 H07B 1.5274 113.18 -122.07 109.24 1.0985
IC C06 C07 C08 C09 1.5274 113.18 -179.82 113.20 1.5272
IC C07 C09 *C08 H08A 1.5274 113.20 -122.03 109.31 1.0987
IC C07 C09 *C08 H08B 1.5274 113.20 121.99 109.18 1.0985
IC C07 C08 C09 C10 1.5274 113.20 -179.68 112.90 1.5271
IC C08 C10 *C09 H09A 1.5272 112.90 122.07 109.62 1.0983
IC C08 C10 *C09 H09B 1.5272 112.90 -121.72 109.19 1.0986
IC C08 C09 C10 C11 1.5272 112.90 179.48 112.30 1.5267
IC C09 C11 *C10 H10A 1.5271 112.30 -122.20 109.34 1.0973
IC C09 C11 *C10 H10B 1.5271 112.30 121.39 108.02 1.0961
IC C09 C10 C11 N 1.5271 112.30 -179.33 113.09 1.4552
IC C10 N *C11 H11A 1.5267 113.09 122.90 107.98 1.0956
IC C10 N *C11 H11B 1.5267 113.09 -121.10 107.06 1.0931
IC C10 C11 N C12 1.5267 113.09 79.50 120.73 1.3665
IC C11 C12 *N HN 1.4552 120.73 165.38 118.92 1.0112
IC HN N C12 C13 1.0112 118.92 -12.43 115.47 1.5162
IC N C13 *C12 OD 1.3665 115.47 176.72 122.23 1.2341
IC N C12 C13 H13A 1.3665 115.47 24.56 113.02 1.0933
IC N C12 C13 H13B 1.3665 115.47 146.23 108.48 1.0901
IC N C12 C13 H13C 1.3665 115.47 -96.29 109.05 1.0938
! -----

```

PATChing FIRS NONE LAST NONE

```

! *****
! 09) -OC6H5 RESIDUE *
! *
! SAM MODEL PARENT CGenFF RESIdue *
! *****
RESIdue POXY 0.00 !
GRouP ! !
ATOM C17 CG2R61 -0.115 ! ! Phenoxy charge groups

```

ATOM H17 HGR61 0.115 ! ! from ETOB (ethoxybenzene)  
 GROUp ! H17 !  
 ATOM C16 CG2R61 -0.115 ! | !  
 ATOM H16 HGR61 0.115 ! C17 !  
 GROUp ! / \ !  
 ATOM C15 CG2R61 -0.115 ! H15-C15 C16-H16 !  
 ATOM H15 HGR61 0.115 ! | | !  
 GROUp ! | | !  
 ATOM C14 CG2R61 -0.115 ! H13-C13 C14-H14 !  
 ATOM H14 HGR61 0.115 ! \ / !  
 GROUp ! C12 !  
 ATOM C13 CG2R61 -0.115 ! / !  
 ATOM H13 HGR61 0.115 ! / !  
 GROUp ! O !  
 ATOM C12 CG2R61 0.22 ! \ !  
 ATOM O OG301P -0.39 ! \ !  
 ATOM C11 CG321 -0.01 ! C11-H11A !  
 ATOM H11A HGA2 0.09 ! /\ !  
 ATOM H11B HGA2 0.09 ! / H11B !  
 GROUp ! !  
 ATOM C10 CG321 -0.18 ! H10A-C10 ! Methylene from HEXA (hexane)  
 ATOM H10A HGA2 0.09 ! /\ !  
 ATOM H10B HGA2 0.09 ! H10B \ !  
 GROUp ! !  
 ATOM C09 CG321 -0.18 ! C09-H09A !  
 ATOM H09A HGA2 0.09 ! /\ !  
 ATOM H09B HGA2 0.09 ! / H09B !  
 GROUp ! !  
 ATOM C08 CG321 -0.18 ! H08A-C08 !  
 ATOM H08A HGA2 0.09 ! /\ !  
 ATOM H08B HGA2 0.09 ! H08B \ !  
 GROUp ! !  
 ATOM C07 CG321 -0.18 ! C07-H07A !  
 ATOM H07A HGA2 0.09 ! /\ !  
 ATOM H07B HGA2 0.09 ! / H07B !  
 GROUp ! !  
 ATOM C06 CG321 -0.18 ! H06A-C06 !  
 ATOM H06A HGA2 0.09 ! /\ !  
 ATOM H06B HGA2 0.09 ! H06B \ !  
 GROUp ! !  
 ATOM C05 CG321 -0.18 ! C05-H05A !  
 ATOM H05A HGA2 0.09 ! /\ !  
 ATOM H05B HGA2 0.09 ! / H05B !  
 GROUp ! !  
 ATOM C04 CG321 -0.18 ! H04A-C04 !  
 ATOM H04A HGA2 0.09 ! /\ !  
 ATOM H04B HGA2 0.09 ! H04B \ !  
 GROUp ! !  
 ATOM C03 CG321 -0.18 ! C03-H03A !  
 ATOM H03A HGA2 0.09 ! /\ !  
 ATOM H03B HGA2 0.09 ! / H03B !  
 GROUp ! !

```

ATOM C02 CG321 -0.18 ! H02A-C02      !
ATOM H02A HGA2  0.09 !  /\      !
ATOM H02B HGA2  0.09 !  H02B \    !
GROUp           !           !
ATOM C01 CG321 -0.11 !      C01-H01A ! Thiol from CYS (amino acid)
ATOM H01A HGA2  0.09 !      / \    !
ATOM H01B HGA2  0.09 !      / H01B !
           !      /      !
ATOM SH SG311 -0.23 !  SH      !
ATOM HS HGP3  0.16 !  \      !
           !  HS      !

```

```

! *****

```

```

BOND  HS SH
BOND  SH C01
BOND  C01 C02 C01 H01A C01 H01B
BOND  C02 C03 C02 H02A C02 H02B
BOND  C03 C04 C03 H03A C03 H03B
BOND  C04 C05 C04 H04A C04 H04B
BOND  C05 C06 C05 H05A C05 H05B
BOND  C06 C07 C06 H06A C06 H06B
BOND  C07 C08 C07 H07A C07 H07B
BOND  C08 C09 C08 H08A C08 H08B
BOND  C09 C10 C09 H09A C09 H09B
BOND  C10 C11 C10 H10A C10 H10B
BOND  C11 O   C11 H11A C11 H11B
BOND  O   C12
BOND  C12 C13 C12 C14
BOND  C13 H13 C13 C15
BOND  C14 H14 C14 C16
BOND  C15 H15 C15 C17
BOND  C16 H16 C16 C17
BOND  C17 H17

```

```

! i j k l R(ij/k) T(ijk/kj) PHI(ijkl) T(jkl) R(kl)
! -----

```

```

IC C02 C01 SH HS 1.5242 109.34 180.00 96.90 1.3418
IC SH C02 *C01 H01A 1.8245 109.34 120.39 109.86 1.0933
IC SH C02 *C01 H01B 1.8245 109.34 -120.39 109.86 1.0933
IC SH C01 C02 C03 1.8245 109.34 180.00 112.08 1.5278
IC C01 C03 *C02 H02A 1.5242 112.08 -121.56 109.53 1.0971
IC C01 C03 *C02 H02B 1.5242 112.08 121.56 109.53 1.0971
IC C01 C02 C03 C04 1.5242 112.08 180.00 112.82 1.5273
IC C02 C04 *C03 H03A 1.5278 112.82 121.95 109.25 1.0985
IC C02 C04 *C03 H03B 1.5278 112.82 -121.95 109.25 1.0985
IC C02 C03 C04 C05 1.5278 112.82 180.00 113.07 1.5272
IC C03 C05 *C04 H04A 1.5273 113.07 -122.00 109.33 1.0983
IC C03 C05 *C04 H04B 1.5273 113.07 122.00 109.33 1.0983
IC C03 C04 C05 C06 1.5273 113.07 180.00 113.18 1.5263
IC C04 C06 *C05 H05A 1.5272 113.18 122.06 109.30 1.0989
IC C04 C06 *C05 H05B 1.5272 113.18 -122.06 109.30 1.0989
IC C04 C05 C06 C07 1.5272 113.18 180.00 113.18 1.5272
IC C05 C07 *C06 H06A 1.5263 113.18 -122.08 109.25 1.0989

```

```

IC C05 C07 *C06 H06B 1.5263 113.18 122.08 109.25 1.0989
IC C05 C06 C07 C08 1.5263 113.18 180.00 113.20 1.5271
IC C06 C08 *C07 H07A 1.5272 113.20 122.07 109.28 1.0989
IC C06 C08 *C07 H07B 1.5272 113.20 -122.07 109.28 1.0989
IC C06 C07 C08 C09 1.5272 113.20 180.00 113.07 1.5270
IC C07 C09 *C08 H08A 1.5271 113.07 -122.03 109.26 1.0983
IC C07 C09 *C08 H08B 1.5271 113.07 122.03 109.26 1.0983
IC C07 C08 C09 C10 1.5271 113.07 180.00 112.71 1.5278
IC C08 C10 *C09 H09A 1.5270 112.71 121.84 109.59 1.0982
IC C08 C10 *C09 H09B 1.5270 112.71 -121.84 109.59 1.0982
IC C08 C09 C10 C11 1.5270 112.71 180.00 112.16 1.5162
IC C09 C11 *C10 H10A 1.5278 112.16 -121.97 108.55 1.0954
IC C09 C11 *C10 H10B 1.5278 112.16 121.97 108.55 1.0954
IC C09 C10 C11 O 1.5278 112.16 180.00 107.10 1.4296
IC C10 O *C11 H11A 1.5162 107.10 120.47 110.10 1.0996
IC C10 O *C11 H11B 1.5162 107.10 -120.47 110.10 1.0996
IC C10 C11 O C12 1.5162 107.10 180.00 117.26 1.3721
IC C11 O C12 C13 1.4296 117.26 180.00 115.11 1.4022
IC C13 O *C12 C14 1.4022 115.11 180.00 124.86 1.3998
IC O C12 C13 C15 1.3721 115.11 180.00 120.03 1.3901
IC C15 C12 *C13 H13 1.3901 120.03 180.00 118.28 1.0867
IC O C12 C14 C16 1.3721 124.86 180.00 119.22 1.3996
IC C16 C12 *C14 H14 1.3996 119.22 180.00 121.30 1.0847
IC C12 C13 C15 C17 1.4022 120.03 0.00 120.41 1.3995
IC C17 C13 *C15 H15 1.3995 120.41 180.00 119.43 1.0878
IC C17 C14 *C16 H16 1.3925 120.98 180.00 118.96 1.0875
IC C15 C16 *C17 H17 1.3995 119.32 180.00 120.30 1.0870
! -----

```

PATChing FIRS NONE LAST NONE

! \*\*\*\*\*

! 10) -OCH2CF3 RESIDUE

```

!
!
! SAM MODEL PARENT CGenFF RESidue *
! *****

```

```

RESidue TFCO 0.00 ! FB FC !
! \ / ! Trifluoroethoxy charge group
GROUP ! C13 ! was manufactured by combining
ATOM C13 CG302 0.34 ! H12B / \ ! the -CH2-CF3 from TFE
ATOM FA FGA3 -0.14 ! \ / FA ! (trifluoroethanol) with the
ATOM FB FGA3 -0.14 ! C12 ! -CH2-O-CH2- from DETE
ATOM FC FGA3 -0.14 ! / \ ! (diethylether) with a charge
ATOM C12 CG321 0.07 ! / H12A ! of -0.01 added to O and a
ATOM H12A HGA2 0.09 ! O ! charge of +0.09 added to C12
ATOM H12B HGA2 0.09 ! \ ! due to the Fluorines pulling
ATOM O OG301 -0.34 ! \ ! extra electron density toward
ATOM C11 CG321 -0.01 ! C11-H11A ! them.
ATOM H11A HGA2 0.09 ! / \ !
ATOM H11B HGA2 0.09 ! / H11B !
GROUP ! !

```



ATOM C10 CG321 -0.18 ! H10A-C10 ! Methylene from HEXA (hexane)

ATOM H10A HGA2 0.09 ! / \ !

ATOM H10B HGA2 0.09 ! H10B \ !

GROUP ! !

ATOM C09 CG321 -0.18 ! C09-H09A !

ATOM H09A HGA2 0.09 ! / \ !

ATOM H09B HGA2 0.09 ! / H09B !

GROUP ! !

ATOM C08 CG321 -0.18 ! H08A-C08 !

ATOM H08A HGA2 0.09 ! / \ !

ATOM H08B HGA2 0.09 ! H08B \ !

GROUP ! !

ATOM C07 CG321 -0.18 ! C07-H07A !

ATOM H07A HGA2 0.09 ! / \ !

ATOM H07B HGA2 0.09 ! / H07B !

GROUP ! !

ATOM C06 CG321 -0.18 ! H06A-C06 !

ATOM H06A HGA2 0.09 ! / \ !

ATOM H06B HGA2 0.09 ! H06B \ !

GROUP ! !

ATOM C05 CG321 -0.18 ! C05-H05A !

ATOM H05A HGA2 0.09 ! / \ !

ATOM H05B HGA2 0.09 ! / H05B !

GROUP ! !

ATOM C04 CG321 -0.18 ! H04A-C04 !

ATOM H04A HGA2 0.09 ! / \ !

ATOM H04B HGA2 0.09 ! H04B \ !

GROUP ! !

ATOM C03 CG321 -0.18 ! C03-H03A !

ATOM H03A HGA2 0.09 ! / \ !

ATOM H03B HGA2 0.09 ! / H03B !

GROUP ! !

ATOM C02 CG321 -0.18 ! H02A-C02 !

ATOM H02A HGA2 0.09 ! / \ !

ATOM H02B HGA2 0.09 ! H02B \ !

GROUP ! !

ATOM C01 CG321 -0.11 ! C01-H01A ! Thiol from CYS (amino acid)

ATOM H01A HGA2 0.09 ! / \ !

ATOM H01B HGA2 0.09 ! / H01B !

! / !

ATOM SH SG311 -0.23 ! SH !

ATOM HS HGP3 0.16 ! \ !

! HS !

! \*\*\*\*\*

BOND HS SH

BOND SH C01

BOND C01 C02 C01 H01A C01 H01B

BOND C02 C03 C02 H02A C02 H02B

BOND C03 C04 C03 H03A C03 H03B

BOND C04 C05 C04 H04A C04 H04B

BOND C05 C06 C05 H05A C05 H05B

BOND C06 C07 C06 H06A C06 H06B

BOND C07 C08 C07 H07A C07 H07B  
 BOND C08 C09 C08 H08A C08 H08B  
 BOND C09 C10 C09 H09A C09 H09B  
 BOND C10 C11 C10 H10A C10 H10B  
 BOND C11 O C11 H11A C11 H11B  
 BOND O C12  
 BOND C12 C13 C12 H12A C12 H12B  
 BOND C13 FA C13 FB C13 FC

| !  | i     | j     | k     | l     | R(ij/k) | T(ijk/kj) | PHI(ijkl) | T(jkl) | R(kl)  |
|----|-------|-------|-------|-------|---------|-----------|-----------|--------|--------|
| !  | ----- | ----- | ----- | ----- | -----   | -----     | -----     | -----  | -----  |
| IC | C02   | C01   | SH    | HS    | 1.5238  | 109.36    | 179.94    | 96.88  | 1.3418 |
| IC | SH    | C02   | *C01  | H01A  | 1.8253  | 109.36    | 120.43    | 109.94 | 1.0939 |
| IC | SH    | C02   | *C01  | H01B  | 1.8253  | 109.36    | -120.38   | 109.88 | 1.0936 |
| IC | SH    | C01   | C02   | C03   | 1.8253  | 109.36    | 179.91    | 112.05 | 1.5275 |
| IC | C01   | C03   | *C02  | H02A  | 1.5238  | 112.05    | -121.55   | 109.54 | 1.0969 |
| IC | C01   | C03   | *C02  | H02B  | 1.5238  | 112.05    | 121.61    | 109.54 | 1.0958 |
| IC | C01   | C02   | C03   | C04   | 1.5238  | 112.05    | 179.99    | 112.78 | 1.5278 |
| IC | C02   | C04   | *C03  | H03A  | 1.5275  | 112.78    | 121.99    | 109.26 | 1.0979 |
| IC | C02   | C04   | *C03  | H03B  | 1.5275  | 112.78    | -121.90   | 109.24 | 1.0977 |
| IC | C02   | C03   | C04   | C05   | 1.5275  | 112.78    | 179.93    | 113.11 | 1.5271 |
| IC | C03   | C05   | *C04  | H04A  | 1.5278  | 113.11    | -121.99   | 109.32 | 1.0979 |
| IC | C03   | C05   | *C04  | H04B  | 1.5278  | 113.11    | 122.04    | 109.36 | 1.0986 |
| IC | C03   | C04   | C05   | C06   | 1.5278  | 113.11    | 179.99    | 113.13 | 1.5273 |
| IC | C04   | C06   | *C05  | H05A  | 1.5271  | 113.13    | 122.05    | 109.30 | 1.0985 |
| IC | C04   | C06   | *C05  | H05B  | 1.5271  | 113.13    | -121.99   | 109.30 | 1.0989 |
| IC | C04   | C05   | C06   | C07   | 1.5271  | 113.13    | -180.00   | 113.15 | 1.5280 |
| IC | C05   | C07   | *C06  | H06A  | 1.5273  | 113.15    | -122.03   | 109.26 | 1.0979 |
| IC | C05   | C07   | *C06  | H06B  | 1.5273  | 113.15    | 122.01    | 109.28 | 1.0990 |
| IC | C05   | C06   | C07   | C08   | 1.5273  | 113.15    | 179.83    | 113.11 | 1.5266 |
| IC | C06   | C08   | *C07  | H07A  | 1.5280  | 113.11    | 121.96    | 109.32 | 1.0987 |
| IC | C06   | C08   | *C07  | H07B  | 1.5280  | 113.11    | -122.01   | 109.36 | 1.0984 |
| IC | C06   | C07   | C08   | C09   | 1.5280  | 113.11    | -179.86   | 113.08 | 1.5283 |
| IC | C07   | C09   | *C08  | H08A  | 1.5266  | 113.08    | -122.01   | 109.24 | 1.0977 |
| IC | C07   | C09   | *C08  | H08B  | 1.5266  | 113.08    | 122.06    | 109.24 | 1.0982 |
| IC | C07   | C08   | C09   | C10   | 1.5266  | 113.08    | 179.70    | 112.72 | 1.5274 |
| IC | C08   | C10   | *C09  | H09A  | 1.5283  | 112.72    | 121.73    | 109.53 | 1.0978 |
| IC | C08   | C10   | *C09  | H09B  | 1.5283  | 112.72    | -121.86   | 109.68 | 1.0978 |
| IC | C08   | C09   | C10   | C11   | 1.5283  | 112.72    | -179.64   | 112.21 | 1.5149 |
| IC | C09   | C11   | *C10  | H10A  | 1.5274  | 112.21    | -121.76   | 108.39 | 1.0960 |
| IC | C09   | C11   | *C10  | H10B  | 1.5274  | 112.21    | 122.30    | 108.75 | 1.0953 |
| IC | C09   | C10   | C11   | O     | 1.5274  | 112.21    | 178.34    | 107.28 | 1.4354 |
| IC | C10   | O     | *C11  | H11A  | 1.5149  | 107.28    | 120.93    | 110.57 | 1.0957 |
| IC | C10   | O     | *C11  | H11B  | 1.5149  | 107.28    | -120.42   | 109.52 | 1.1014 |
| IC | C10   | C11   | O     | C12   | 1.5149  | 107.28    | 163.25    | 114.80 | 1.4051 |
| IC | C11   | O     | C12   | C13   | 1.4354  | 114.80    | 78.68     | 113.04 | 1.5141 |
| IC | C13   | O     | *C12  | H12A  | 1.5141  | 113.04    | -122.29   | 112.63 | 1.0995 |
| IC | H12A  | O     | *C12  | H12B  | 1.0995  | 112.63    | -120.02   | 107.26 | 1.0927 |
| IC | O     | C12   | C13   | FA    | 1.4051  | 113.04    | -67.92    | 112.31 | 1.3559 |
| IC | O     | C12   | *C13  | FB    | 2.4356  | 32.07     | 53.03     | 111.88 | 1.3452 |
| IC | O     | C12   | *C13  | FC    | 2.4356  | 32.07     | 172.94    | 109.70 | 1.3553 |
| !  | ----- | ----- | ----- | ----- | -----   | -----     | -----     | -----  | -----  |

## PATChing FIRS NONE LAST NONE

! \*\*\*\*\*

! 11) -(OCH2CH2)3OH RESIDUE \*

! \*

! Note: The internal coordinates for the OEG end cap are for a helical \*

! conformation. The illustration shows a trans conformation for simplicity. \*

! Though the trans conformation is energetically favored in vacuum, the \*

! helical endcap structure is favored when the SAM is solvated in TIP3. \*

! \*

! SAM MODEL PARENT CGenFF RESIdue \*

! \*\*\*\*\*

```

RESIdue PEGH 0.00 !
GROUP ! HO ! Hydroxyl charge group from
ATOM OH OPEG -0.65 ! / ! ETAM (ethanolamine -OH endcap)
ATOM HO HGP1 0.42 ! OH !
ATOM C17 CG321 0.05 ! | !
ATOM H17A HGA2 0.09 ! H17A-C17-H17B !
ATOM H17B HGA2 0.09 ! | !
GROUP ! !
ATOM C16 CG321 -0.01 ! | ! Polyethylene glycol monomer
ATOM H16A HGA2 0.09 ! H16A-C16-H16B ! charge group from PEGM
ATOM H16B HGA2 0.09 ! | !
ATOM O3 OG301 -0.34 ! O3 !
ATOM C15 CG321 -0.01 ! | !
ATOM H15A HGA2 0.09 ! H15A-C15-H15B !
ATOM H15B HGA2 0.09 ! | !
GROUP ! !
ATOM C14 CG321 -0.01 ! | !
ATOM H14A HGA2 0.09 ! H14A-C14-H14B !
ATOM H14B HGA2 0.09 ! | !
ATOM O2 OG301 -0.34 ! O2 !
ATOM C13 CG321 -0.01 ! | !
ATOM H13A HGA2 0.09 ! H13A-C13-H13B !
ATOM H13B HGA2 0.09 ! | !
GROUP ! !
ATOM C12 CG321 -0.01 ! | !
ATOM H12A HGA2 0.09 ! H12A-C12-H12B !
ATOM H12B HGA2 0.09 ! | !
ATOM O1 OG301 -0.34 ! O1 !
ATOM C11 CG321 -0.01 ! | !
ATOM H11A HGA2 0.09 ! H11A-C11-H11B !
ATOM H11B HGA2 0.09 ! | !
GROUP ! !
ATOM C10 CG321 -0.18 ! H10A-C10 ! Methylene from HEXA (hexane)
ATOM H10A HGA2 0.09 ! /\ !
ATOM H10B HGA2 0.09 ! H10B \ !
GROUP ! !
ATOM C09 CG321 -0.18 ! C09-H09A !
ATOM H09A HGA2 0.09 ! /\ !

```

```

ATOM H09B HGA2  0.09 !    / H09B  !
GROUp          !          !
ATOM C08 CG321 -0.18 ! H08A-C08  !
ATOM H08A HGA2  0.09 !    /\      !
ATOM H08B HGA2  0.09 !    H08B \    !
GROUp          !          !
ATOM C07 CG321 -0.18 !    C07-H07A !
ATOM H07A HGA2  0.09 !    /\      !
ATOM H07B HGA2  0.09 !    / H07B  !
GROUp          !          !
ATOM C06 CG321 -0.18 ! H06A-C06  !
ATOM H06A HGA2  0.09 !    /\      !
ATOM H06B HGA2  0.09 !    H06B \    !
GROUp          !          !
ATOM C05 CG321 -0.18 !    C05-H05A !
ATOM H05A HGA2  0.09 !    /\      !
ATOM H05B HGA2  0.09 !    / H05B  !
GROUp          !          !
ATOM C04 CG321 -0.18 ! H04A-C04  !
ATOM H04A HGA2  0.09 !    /\      !
ATOM H04B HGA2  0.09 !    H04B \    !
GROUp          !          !
ATOM C03 CG321 -0.18 !    C03-H03A !
ATOM H03A HGA2  0.09 !    /\      !
ATOM H03B HGA2  0.09 !    / H03B  !
GROUp          !          !
ATOM C02 CG321 -0.18 ! H02A-C02  !
ATOM H02A HGA2  0.09 !    /\      !
ATOM H02B HGA2  0.09 !    H02B \    !
GROUp          !          !
ATOM C01 CG321 -0.11 !    C01-H01A ! Thiol from CYS (amino acid)
ATOM H01A HGA2  0.09 !    /\      !
ATOM H01B HGA2  0.09 !    / H01B  !
          !    /      !
ATOM SH  SG311 -0.23 !    SH      !
ATOM HS  HGP3  0.16 !    \        !
          !    HS      !

```

! \*\*\*\*\*

\*\*\*\*\*

```

BOND  HS SH
BOND  SH C01
BOND  C01 C02  C01 H01A  C01 H01B
BOND  C02 C03  C02 H02A  C02 H02B
BOND  C03 C04  C03 H03A  C03 H03B
BOND  C04 C05  C04 H04A  C04 H04B
BOND  C05 C06  C05 H05A  C05 H05B
BOND  C06 C07  C06 H06A  C06 H06B
BOND  C07 C08  C07 H07A  C07 H07B
BOND  C08 C09  C08 H08A  C08 H08B
BOND  C09 C10  C09 H09A  C09 H09B
BOND  C10 C11  C10 H10A  C10 H10B
BOND  C11 O1   C11 H11A  C11 H11B
BOND  O1  C12

```

BOND C12 C13 C12 H12A C12 H12B  
 BOND C13 O2 C13 H13A C13 H13B  
 BOND O2 C14  
 BOND C14 C15 C14 H14A C14 H14B  
 BOND C15 O3 C15 H15A C15 H15B  
 BOND O3 C16  
 BOND C16 C17 C16 H16A C16 H16B  
 BOND C17 OH C17 H17A C17 H17B  
 BOND OH HO

! i j k l R(ij/k) T(ijk/kj) PHI(ijkl) T(jkl) R(kl)

! -----

|    |     |     |      |      |        |        |         |        |        |
|----|-----|-----|------|------|--------|--------|---------|--------|--------|
| IC | C02 | C01 | SH   | HS   | 1.5239 | 109.37 | 179.88  | 96.90  | 1.3421 |
| IC | SH  | C02 | *C01 | H01A | 1.8249 | 109.37 | 120.45  | 109.88 | 1.0938 |
| IC | SH  | C02 | *C01 | H01B | 1.8249 | 109.37 | -120.40 | 109.82 | 1.0940 |
| IC | SH  | C01 | C02  | C03  | 1.8249 | 109.37 | 179.99  | 112.13 | 1.5272 |
| IC | C01 | C03 | *C02 | H02A | 1.5239 | 112.13 | -121.56 | 109.53 | 1.0967 |
| IC | C01 | C03 | *C02 | H02B | 1.5239 | 112.13 | 121.65  | 109.54 | 1.0965 |
| IC | C01 | C02 | C03  | C04  | 1.5239 | 112.13 | -179.96 | 112.81 | 1.5282 |
| IC | C02 | C04 | *C03 | H03A | 1.5272 | 112.81 | 122.01  | 109.29 | 1.0982 |
| IC | C02 | C04 | *C03 | H03B | 1.5272 | 112.81 | -121.87 | 109.20 | 1.0988 |
| IC | C02 | C03 | C04  | C05  | 1.5272 | 112.81 | -179.99 | 113.10 | 1.5273 |
| IC | C03 | C05 | *C04 | H04A | 1.5282 | 113.10 | -121.91 | 109.34 | 1.0988 |
| IC | C03 | C05 | *C04 | H04B | 1.5282 | 113.10 | 122.03  | 109.37 | 1.0975 |
| IC | C03 | C04 | C05  | C06  | 1.5282 | 113.10 | -179.97 | 113.14 | 1.5273 |
| IC | C04 | C06 | *C05 | H05A | 1.5273 | 113.14 | 122.01  | 109.33 | 1.0983 |
| IC | C04 | C06 | *C05 | H05B | 1.5273 | 113.14 | -121.99 | 109.28 | 1.0987 |
| IC | C04 | C05 | C06  | C07  | 1.5273 | 113.14 | 179.99  | 113.17 | 1.5267 |
| IC | C05 | C07 | *C06 | H06A | 1.5273 | 113.17 | -121.98 | 109.32 | 1.0989 |
| IC | C05 | C07 | *C06 | H06B | 1.5273 | 113.17 | 122.02  | 109.33 | 1.0981 |
| IC | C05 | C06 | C07  | C08  | 1.5273 | 113.17 | -179.91 | 113.15 | 1.5272 |
| IC | C06 | C08 | *C07 | H07A | 1.5267 | 113.15 | 122.04  | 109.27 | 1.0992 |
| IC | C06 | C08 | *C07 | H07B | 1.5267 | 113.15 | -122.06 | 109.26 | 1.0985 |
| IC | C06 | C07 | C08  | C09  | 1.5267 | 113.15 | -179.91 | 113.15 | 1.5273 |
| IC | C07 | C09 | *C08 | H08A | 1.5272 | 113.15 | -122.07 | 109.21 | 1.0984 |
| IC | C07 | C09 | *C08 | H08B | 1.5272 | 113.15 | 122.00  | 109.24 | 1.0984 |
| IC | C07 | C08 | C09  | C10  | 1.5272 | 113.15 | -179.97 | 113.03 | 1.5279 |
| IC | C08 | C10 | *C09 | H09A | 1.5273 | 113.03 | 121.95  | 109.38 | 1.0984 |
| IC | C08 | C10 | *C09 | H09B | 1.5273 | 113.03 | -121.98 | 109.44 | 1.0988 |
| IC | C08 | C09 | C10  | C11  | 1.5273 | 113.03 | 179.41  | 111.72 | 1.5239 |
| IC | C09 | C11 | *C10 | H10A | 1.5279 | 111.72 | -121.69 | 108.49 | 1.0960 |
| IC | C09 | C11 | *C10 | H10B | 1.5279 | 111.72 | 121.41  | 110.39 | 1.0971 |
| IC | C09 | C10 | C11  | O1   | 1.5279 | 111.72 | 172.61  | 113.93 | 1.4292 |
| IC | C10 | O1  | *C11 | H11A | 1.5239 | 113.93 | 119.25  | 104.11 | 1.0951 |
| IC | C10 | O1  | *C11 | H11B | 1.5239 | 113.93 | -125.74 | 110.35 | 1.0968 |
| IC | C10 | C11 | O1   | C12  | 1.5239 | 113.93 | 65.43   | 115.15 | 1.4205 |
| IC | C11 | O1  | C12  | C13  | 1.4292 | 115.15 | 54.45   | 114.34 | 1.5259 |
| IC | O1  | C13 | *C12 | H12A | 1.4205 | 114.34 | 125.71  | 108.32 | 1.1013 |
| IC | O1  | C13 | *C12 | H12B | 1.4205 | 114.34 | -117.38 | 110.78 | 1.0935 |
| IC | O1  | C12 | C13  | O2   | 1.4205 | 114.34 | 41.02   | 113.81 | 1.4233 |
| IC | C12 | O2  | *C13 | H13A | 1.5259 | 113.81 | -123.91 | 111.18 | 1.0989 |
| IC | C12 | O2  | *C13 | H13B | 1.5259 | 113.81 | 120.67  | 104.21 | 1.0940 |

IC C12 C13 O2 C14 1.5259 113.81 56.79 114.93 1.4223  
IC C13 O2 C14 C15 1.4233 114.93 57.32 113.69 1.5268  
IC O2 C15 \*C14 H14A 1.4223 113.69 -116.81 110.82 1.0935  
IC O2 C15 \*C14 H14B 1.4223 113.69 124.99 109.42 1.0996  
IC O2 C14 C15 O3 1.4223 113.69 40.18 114.07 1.4197  
IC C14 O3 \*C15 H15A 1.5268 114.07 120.91 104.14 1.0934  
IC C14 O3 \*C15 H15B 1.5268 114.07 -124.18 111.59 1.1005  
IC C14 C15 O3 C16 1.5268 114.07 56.35 115.32 1.4221  
IC C15 O3 C16 C17 1.4197 115.32 58.07 114.52 1.5157  
IC O3 C17 \*C16 H16A 1.4221 114.52 125.35 109.56 1.0991  
IC O3 C17 \*C16 H16B 1.4221 114.52 -116.27 108.73 1.0935  
IC O3 C16 C17 OH 1.4221 114.52 54.51 107.87 1.4232  
IC C16 OH \*C17 H17A 1.5157 107.87 -118.33 111.99 1.1008  
IC C16 OH \*C17 H17B 1.5157 107.87 121.76 111.16 1.0999  
IC C16 C17 OH HO 1.5157 107.87 178.28 107.55 0.9722  
! -----

PATChing FIRS NONE LAST NONE

END
